# Supplementary material for: Reprogramming triggers endogenous L1 and Alu retrotransposition in human induced pluripotent stem cells
Source: PubMed Central journal article supplement (PMC4729875; doi:10.1038/ncomms10286), 2016-01-08
Supplement: ncomms10286-s1.pdf [file ncomms10286-s1.pdf]

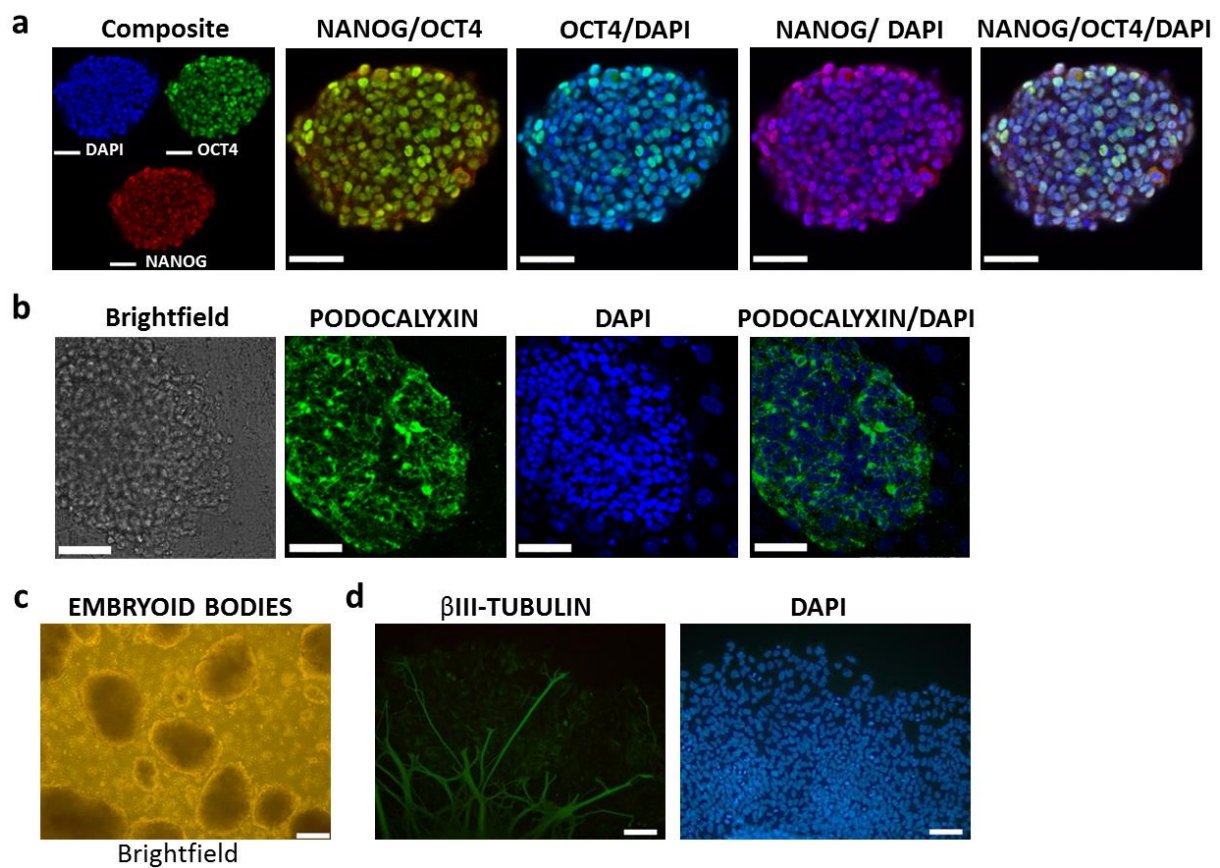

**Supplementary Figure 1: Characterization of the hiPSC line hiPS-SB4.** Undifferentiated hiPS-SB4 cells stain positively for the typical pluripotency markers **(a)** OCT4, NANOG, and **(b)** PODOCALYXIN. **(c)** hiPS-SB4 cells were kept in suspension on polyHEMA-coated plates in embryoid body (EB)-medium to allow formation of cystic EBs. **(d)** After 6 days, EBs were placed onto gelatin-coated plates, and the spontaneously differentiating, attached cells were positive for the ectodermal marker  $\beta$ III-TUBULIN. Scale bars indicate 50  $\mu$ m **(a, b)** and 200  $\mu$ m **(c, d)**, respectively.

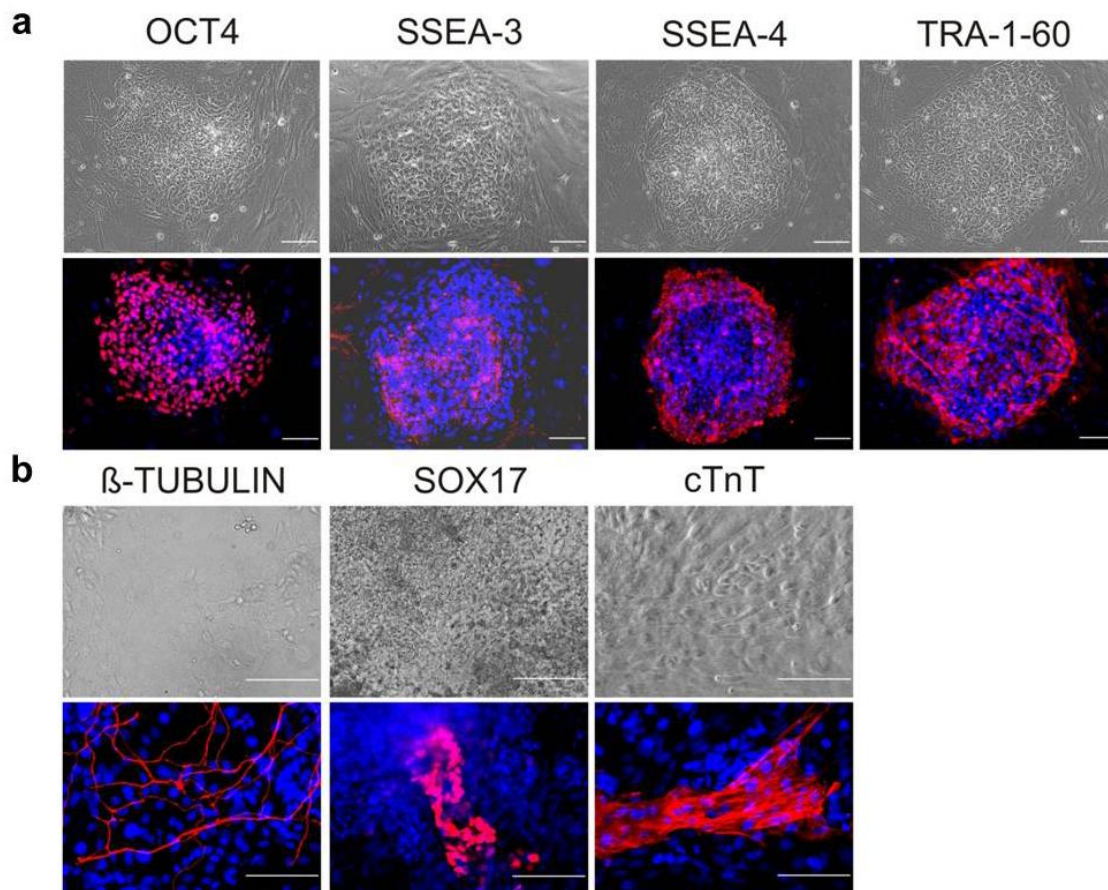

**Supplementary Figure 2: Characterization of the hFF-iPS4 cell line.** (a) Undifferentiated hFF-iPS4 cells (passage 8) express typical markers of pluripotency like OCT4, SSEA-3, SSEA-4 and TRA-1-60. (b) Cells are differentiated via an embryoid body (EB)-based protocol. On day 23 of differentiation, cultures are stained for markers of all three germ layers:  $\beta$ III-tubulin for ectoderm, SOX17 for endoderm and cardiac TroponinT (cTnT) for mesoderm. Nuclei are stained with DAPI. Scale bars represent 100  $\mu$ m;

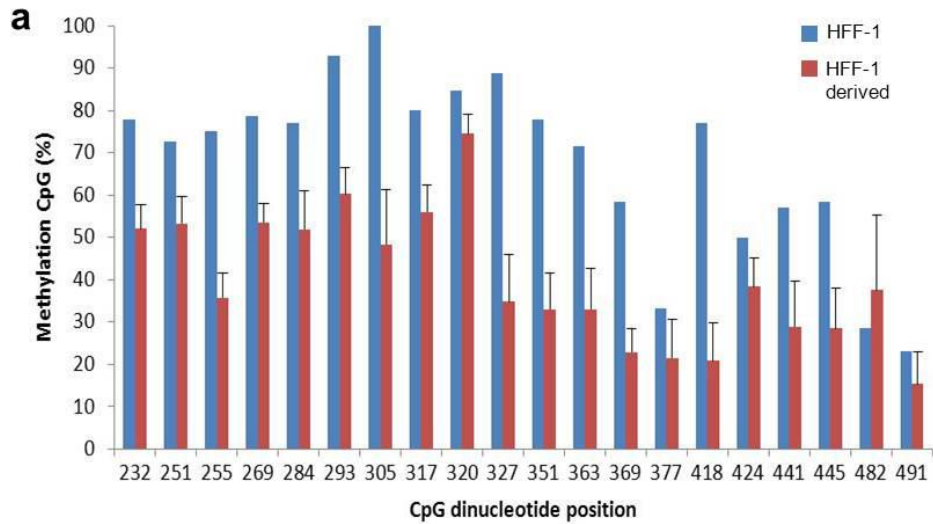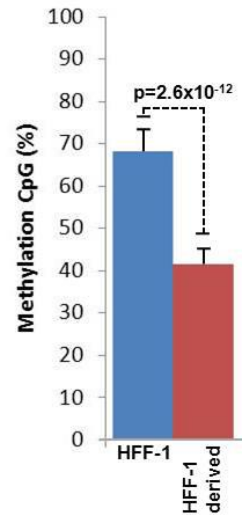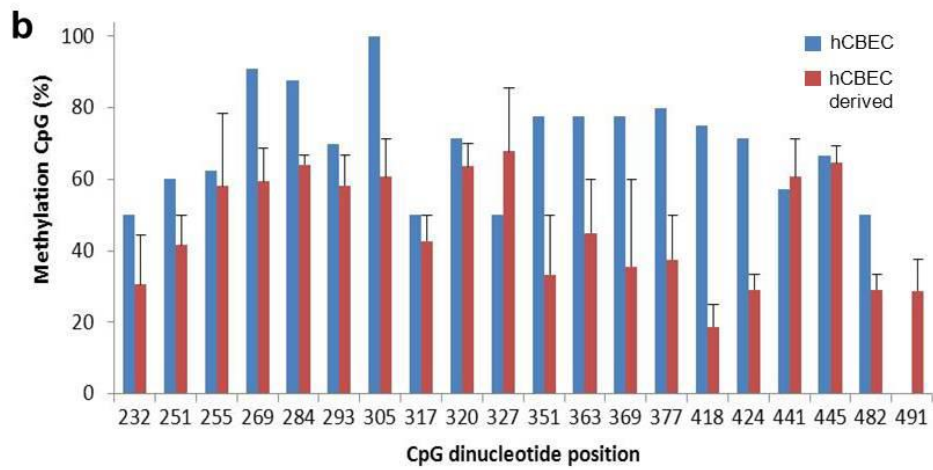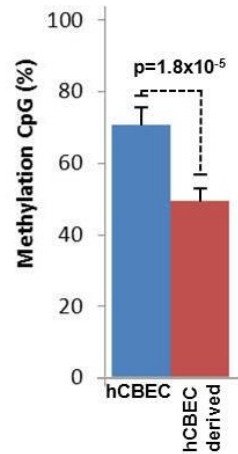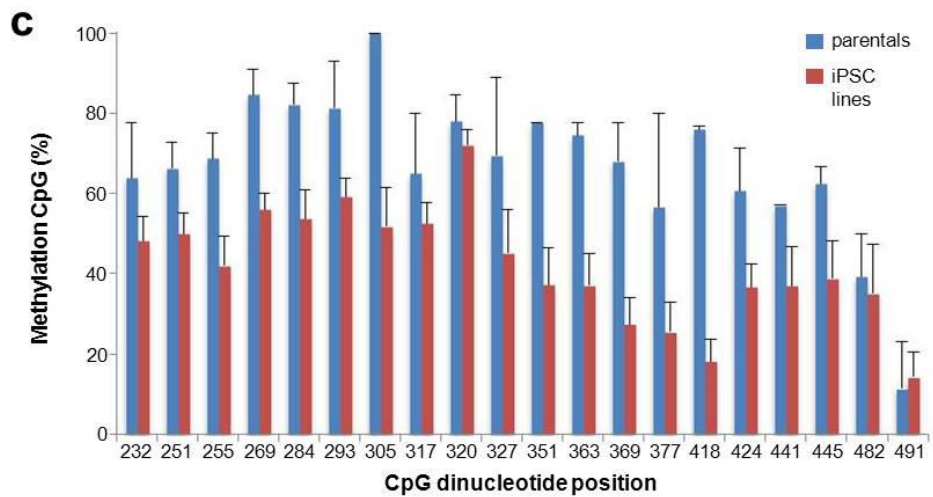

Supplementary Figure S3

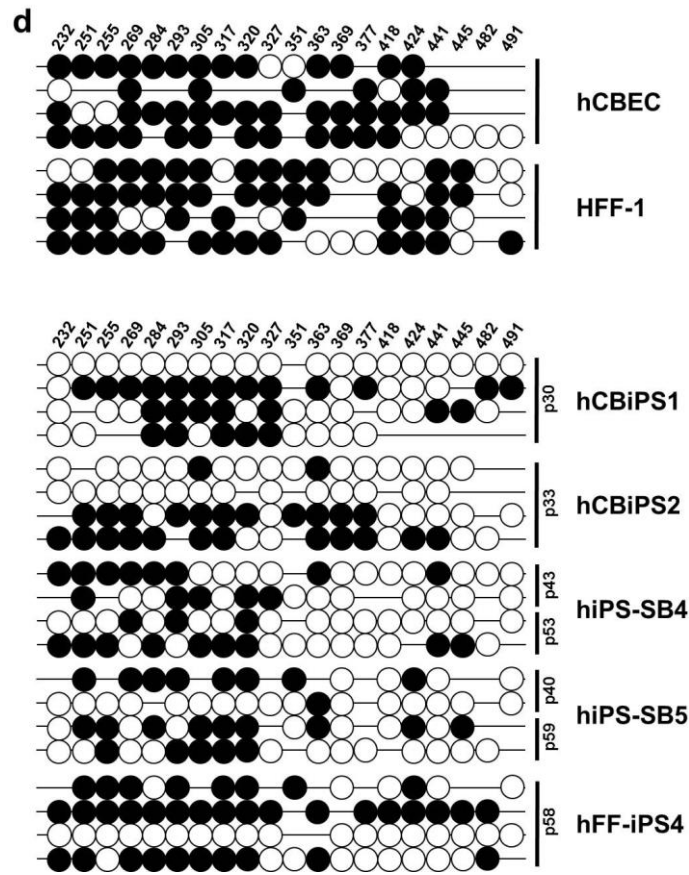

**Supplementary Figure 3: Reprogramming into iPS lines results in global demethylation of L1 promoter sequences.** Comparison of L1 promoter methylation levels in parental HFF-1 (**a**) and hCBEC (**b**) cells with their respective derived iPS lines. Each bar represents the arithmetic mean of methylation frequencies of the parental HFF-1 (**a**, left panel, blue bars, n=18 from one sample) and hCBEC cells (**b**, left panel, blue bars, n=11 from one sample), respectively, and their derived iPS lines (**a**, left panel, red bars, n=66 from five independent samples; left panel, red bars, n=29 from two independent samples) at defined CpG positions. Error bars indicate s.e.m for each CpG position. Right panels represent the overall percentage methylation status of 20 CpG residues in lines hiPS-SB4, hiPS-SB5, and hFF-iPS4 (red bar, 41.35%) relative to their parental cell lines HFF-1 (blue bar, 67.8%) (**a**), and in lines hCBiPS1 and hCBiPS2 (red bar, 49.11%) relative to their parental cell line hCBEC (blue, 70.37%) (**b**); ). p-values calculated using the  $\chi^2$  test. (**c**) Overall methylation status of each CpG position in the genomic L1-Ta promoter sequences of the five hiPS lines and their parental cells. The graph was generated by pooling the data presented in Supplementary Figure 3a and 3b for each CpG position. Each bar represents the arithmetic mean of methylation frequencies of both parental cells/cell lines HFF-1 and hCBEC (blue bars, n=371, from two independent samples) and the derived iPS lines (red bars, n=1116, from seven independent samples). Error bars indicate s.e.m. n, number of independent bisulfite sequencing reads. (**d**) Bisulfite sequencing of L1 promoter regions in hCBEC and HFF-1 cells and their derived iPS lines (hCBiPS1, hCBiPS2, hiPS-SB4, hiPS-SB5, hFF-iPS4). Genomic DNA samples were isolated at different passages (p30 to p59). The individual methylation status of sequences showing the highest similarity to the retrotransposition-competent L1.3 reference element is presented. Each line depicts an independent clone. Open and closed circles indicate unmethylated and methylated CpG dinucleotides, respectively. Mutated CpG sites are indicated by the absence of any circle. Numbers refer to the position of each CpG site in L1.3.

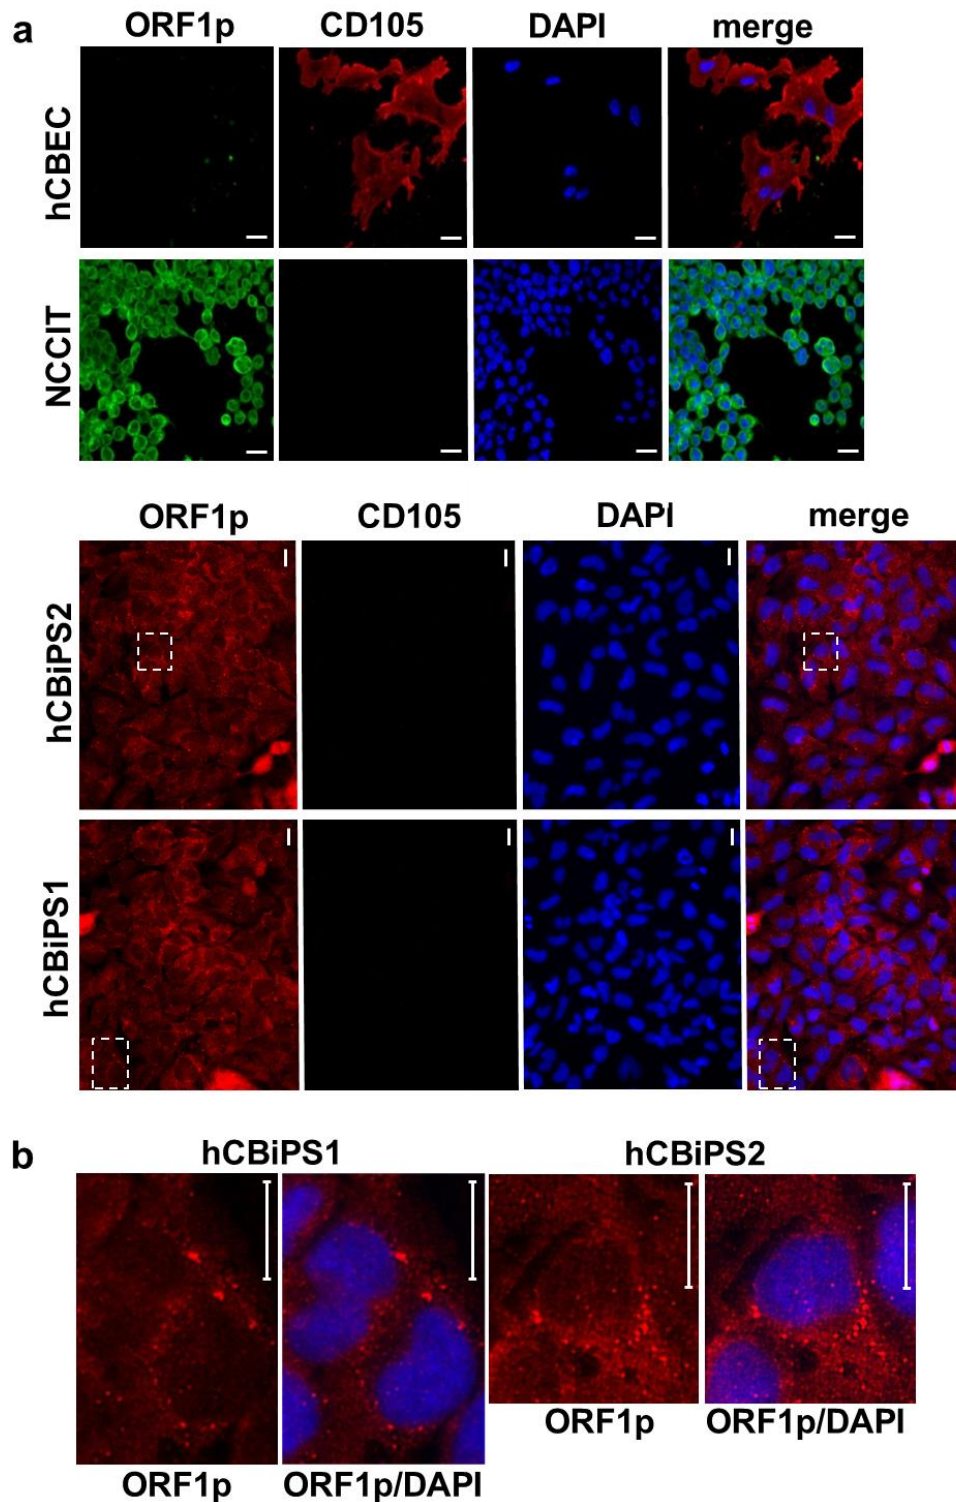

**Supplementary Figure 4: Immunostaining of hiPSC lines hCBiPS1 and hCBiPS2 and their parental cells to monitor induction of endogenous L1 ORF1p expression in hCBEC-derived iPSCs.** (a) Cytoplasmic ORF1p staining indicates activation of endogenous L1 expression after reprogramming of human cord blood-derived endothelial cells into iPSC lines hCBiPS1 and hCBiPS2. Cell lines were assayed at passages number 34 and 27, respectively. The pluripotent embryonal carcinoma cell line NCCIT served as positive control for L1 ORF1p expression. CD105, marker protein expressed on vascular endothelial cells, but absent from pluripotent stem cells. Nuclei are stained with DAPI (blue). Scale bars represent 20  $\mu$ m. Stippled white boxes indicate the enlarged areas presented in (b) showing cytoplasmic localization of endogenous L1 ORF1p accumulated in foci.

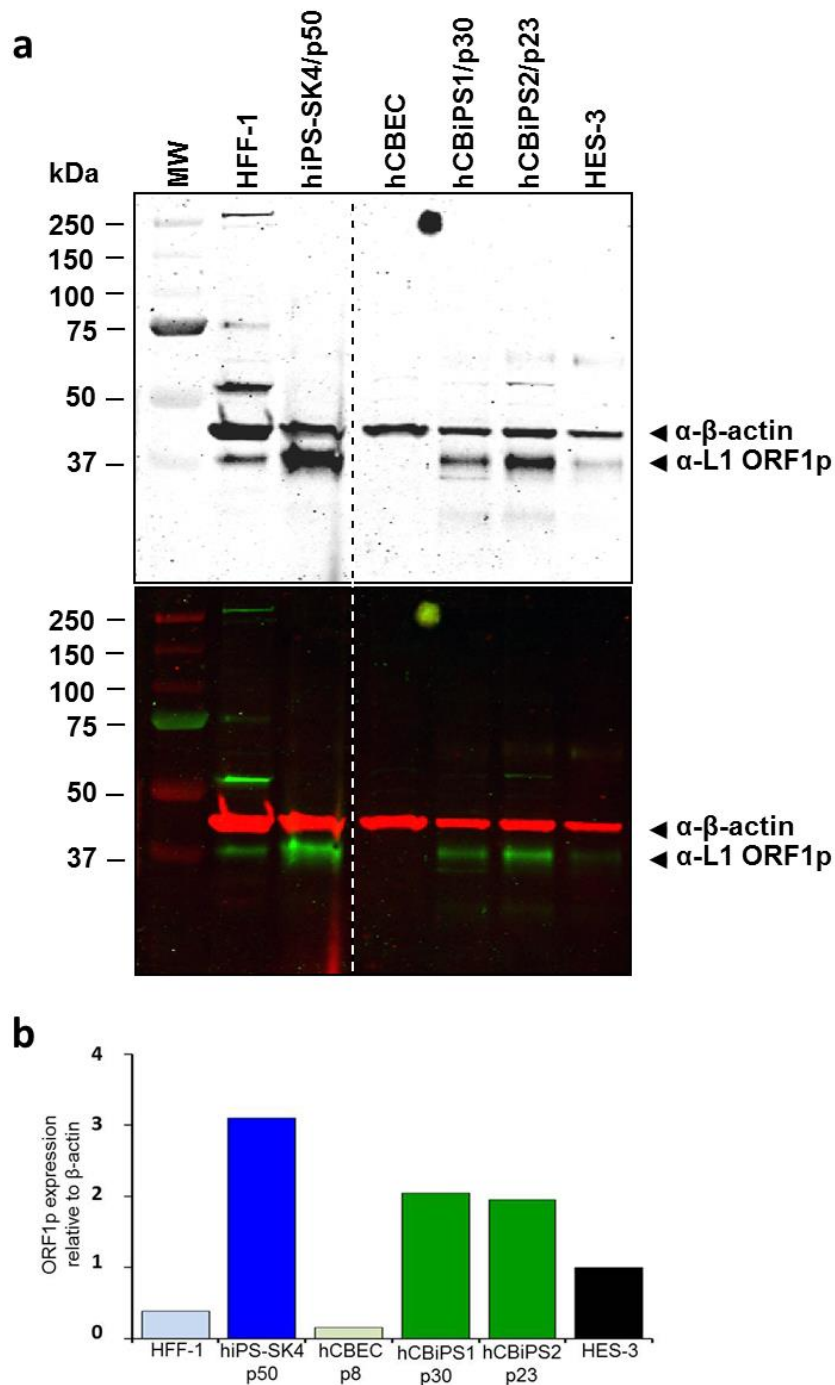

**Supplementary Figure 5: Quantification of the relative increase of endogenous L1 ORF1 protein levels triggered by reprogramming of HFF-1 and hCBEC cells into iPSC lines.** (a) Immunoblot analysis of whole cell lysates from the parental HFF-1 and hCBEC cells and their respective descendant hiPSC lines hFF-iPS4, hCBiPS1, hCBiPS2 was performed using polyclonal  $\alpha$ -ORF1p and  $\alpha$ - $\beta$ -actin antibodies (upper two panels). 20  $\mu$ g of each cell lysate were loaded per lane. Cells were harvested at indicated passages (p) after reprogramming. Stippled line indicates that two lanes of this gel were excised here because the loaded cell lysates were degraded. The image of the multiplexed detection of ORF1p and  $\beta$ -actin using two infrared fluorescence fluorophores is shown as bottom panel (see Methods). ORF1p expression levels were determined by quantifying the ORF1p/ $\beta$ -actin expression rate (see Methods). (b) Relative ORF1p expression in the different cell lines is presented as bar diagram. Endogenous L1 ORF1p levels are increased by  $\sim$ 8 and  $\sim$ 12-fold in late passage hiPSCs relative to their parental HFF-1 and hCBEC cells, respectively. Endogenous L1 protein levels in HFF-1 and hCBEC-derived hiPSCs are also elevated by 2 and 3-fold, respectively, relative to embryonic HES-3 stem cells. The ratio of ORF1p/ $\beta$ -actin signal in HES-3 cells was set as 1.

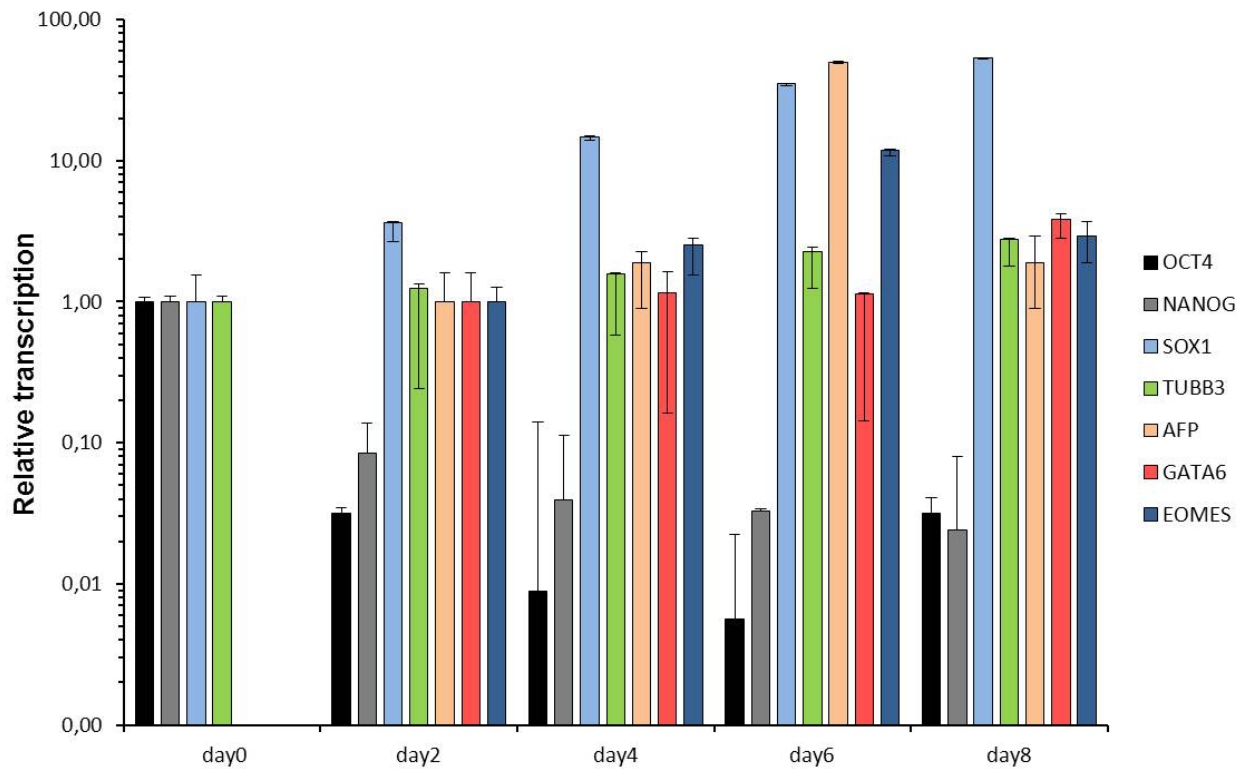

**Supplementary Figure 6: Real-Time qRT PCR analysis to follow multi-lineage differentiation of hiPS-SB5.1 cells into EBs.** Expression of endogenous (NANOG) and transgenic (OCT4) pluripotency-related factors as well as endoderm ( $\alpha$ -fetoprotein [AFP], GATA-binding factor 6 [GATA6]), mesoderm (eomesodermin [EOMES]), and ectoderm-specific (SOX1,  $\beta$ III-tubulin [TUBB3]) marker proteins was quantified before (p10/day 0) and after 2, 4, 6 and 8 days of differentiation into EBs. mRNA levels of the factors OCT4, NANOG, SOX1 and TUBB3 in iPSCs at passage 10 (day 0) are set as 1. mRNA levels of the factors AFP, GATA6 and EOMES in iPSCs that were differentiated for 2 days (day 2) were set as 1 because transcript levels of these factors were not determined at day 0. Data were normalized to GAPDH transcript levels. Each bar represents the arithmetic mean  $\pm$  s.e.m of data obtained from experiments that were performed as biological triplicates (n=3).

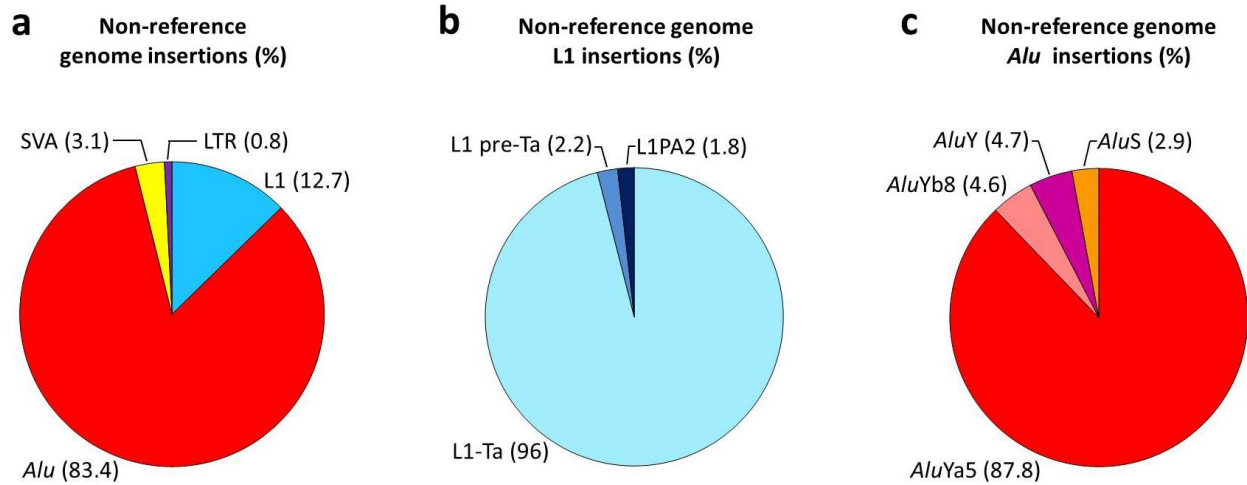

**Supplementary Figure 7: Relative frequencies of non-reference genome retrotransposon insertions of a) different retrotransposon families as detected by RC-seq, and of non-reference genome insertions of L1 (b) and *Alu* (c) subfamilies.** Total number of non-reference insertions detected by RC-seq, and defined as 100% in (a), n=40,608.



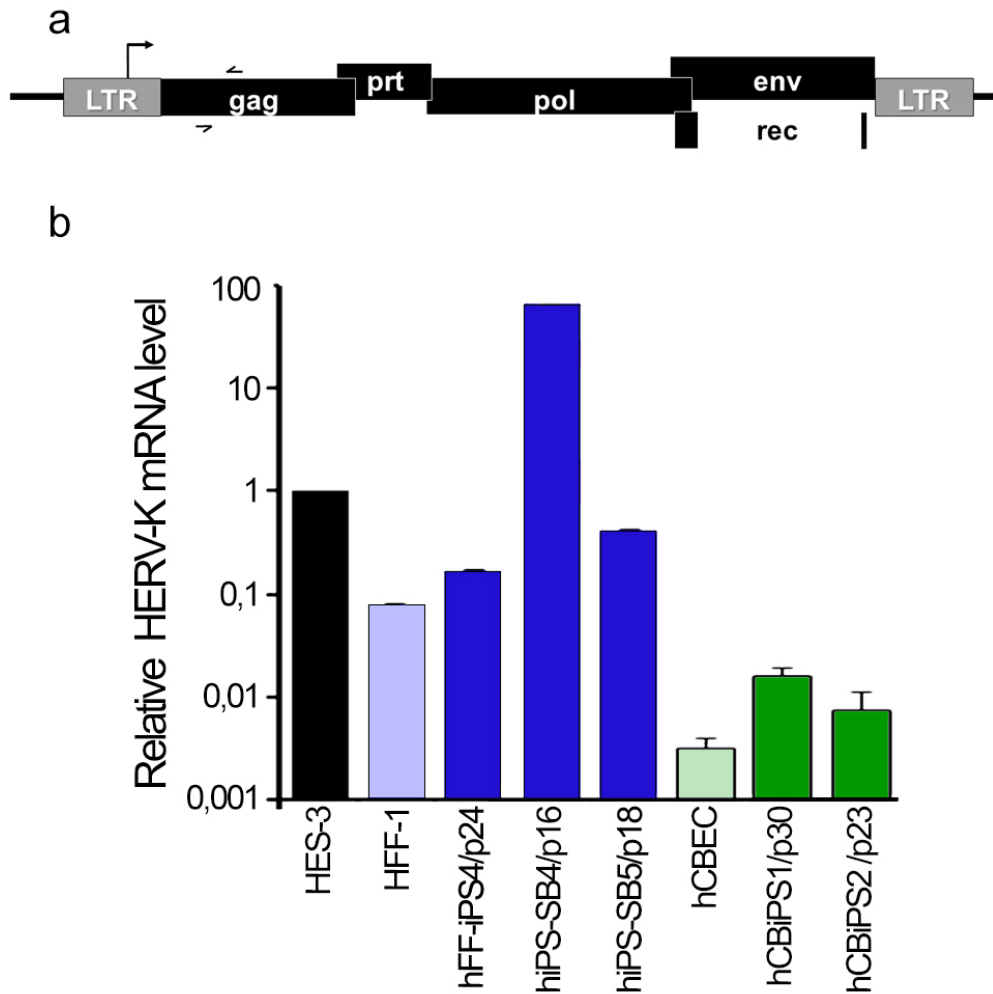

**Supplementary Figure 8: HERV-K/HML-2 mRNA levels are upregulated in pluripotent stem cells - Reprogramming causes activation of HERV-K/HML-2 transcription in iPSCs.** (a) Structure of the HERV-K/HML-2 endogenous retrovirus. Primers (arrows) used for qRT-PCR anneal within the *gag*-region of cDNAs generated from HERV-K/HML-2 full length mRNA (Supplementary Table 1) and amplify a 167-bp product. LTR, long terminal repeat; gag, group-specific antigen; prt, protease, pol, polymerase; env, envelope; rec, HERV-K-specific accessory protein. (b) HERV-K/HML-2 transcription is upregulated at early passages after reprogramming into iPSC lines. Real-Time qRT-PCR analyses were performed with cDNAs generated from cytoplasmic RNA preparations isolated from parental cells (HFF-1 and hCBEC) and from earlier passages of their derived iPSC lines (Fig. 1b/left panel; Table 1). Reprogramming lead to a 2 to 827- fold increase of relative HERV-K expression levels in HFF-1-derived iPSC lines hFF-iPS4, hiPS-SB4 and hiPS-SB5, and a 2 to 5-fold increase in hCBEC-derived iPSC lines hCBiPS1 and hCBiPS2. The endogenous HERV-K/HML-2 transcript level in HES-3 cells was set as 1. Each bar depicts the arithmetic mean  $\pm$ s.d. from biological triplicates (n=3).

## a) *De novo* retrotransposition events in hiPSCs

### L1-dn10

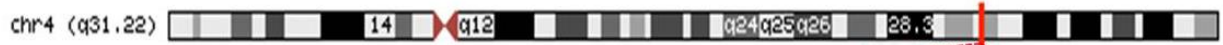

Post-Integration Site:

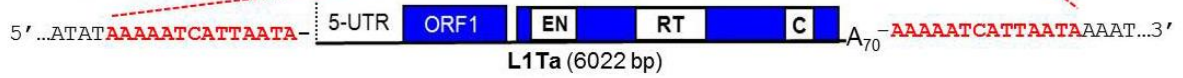

Pre-Integration Site:

Chr4 (148048026)

5' .....ATATAAAAATCATTAAATAAAAATATTACATTT.....3'  
 3' .....tata**atttt**tagtaattattttataaatgtaaa.....5'

### L1-dn13

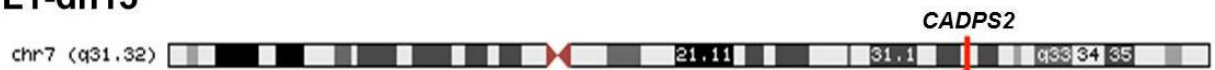

Post-Integration Site:

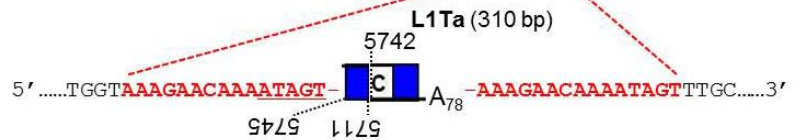

Pre-Integration Site:

Chr7 (122198483)

5' .....TTAAGAGAAACGAATGGTAAAGAACAATAAGTTTGCATAATAAT.....3'  
 3' .....aattctctttgcttacc**atttc**ttgtttatcaaacgatttatta.....5'

### L1-dn6

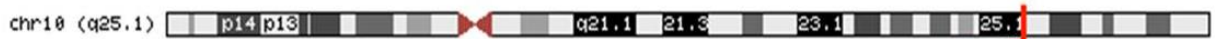

Post-Integration Site:

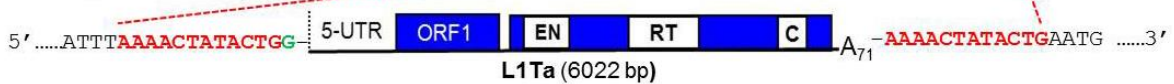

Pre-Integration Site:

Chr10 (111315157)

5' .....ATTTAAACTTACTGAATGCTATCTTT.....3'  
 3' .....taa**atttt**gatatgacttacgatagaaa.....5'

### L1-dn14

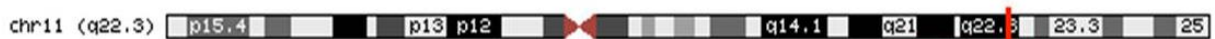

Post-Integration Site:

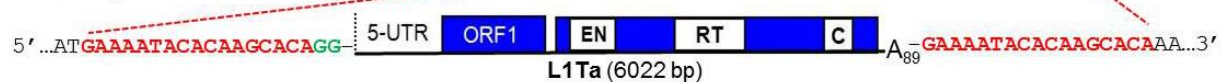

Pre-Integration Site:

Chr11 (109077866)

5' .....AAATTGTCCATTTATGATGAAAATACACAAGCACAACTAGAGAT.....3'  
 3' .....ttaa**actttt**atgtgttcgtgtttgatctcta.....5'

### L1-dn3

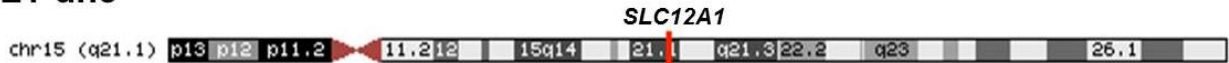

**Post-Integration Site:**

5' .....CTTCGAT**AGA** **C** **A**<sub>48</sub> **AGA**AAGTCTATAT.....3'  
 L1Ta (251 bp)

**Pre-Integration Site:**  
 Chr15: 48504919

5' .....CTTCGAT**AGA**AAGTCTATAT.....3'  
 3' .....gaagct**atc**tttcagatata.....5'

### L1-dn4

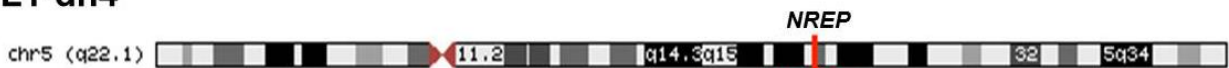

**Post-Integration Site:**

5' ...GACA**ACTTACTG** 5-UTR **ORF1** **EN** **RT** **C** **A**<sub>6020 (ΔA<sub>n</sub>)</sub> **ACTTACTG**TGCT...3'  
 L1 pre-Ta (6018 bp)

**Pre-Integration Site:**  
 Chr5 (111275813)

5' .....GTTTTGTTTTGACA**ACTTACTG**TGCTATTCTGTAGAGTG.....3'  
 3' .....caaaacaaaactg**ttg**aatgacacgataagaacatctcac.....5'

### L1-dn15

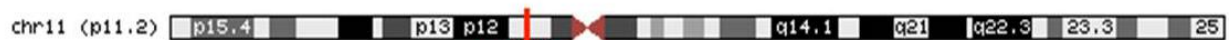

**Post-Integration Site:**

5' ...ACTT**AAAAATGCATCCACAGC** **ORF1** **EN** **RT** **C** **A**<sub>80</sub> **AAAAATGCATCCACAGC**CATAT...3'  
 L1Ta (5938 bp)

**Pre-Integration Site:**  
 Chr11 (45574486)

5' .....GGATGGACTACTT**AAAAATGCATCCACAGC**CATATATTT.....3'  
 3' .....cctacctgatga**at**ttttacgtaggtgctgatataaa.....5'

### Alu-1

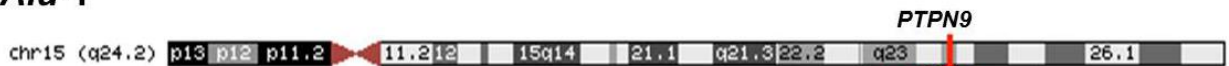

**Post-Integration Site:**

5' .....TGTT**AATAATATTGAGACTTC** **AluYb8** **A**<sub>31</sub> **AATAATATTGAGACTTC**CAATA.....3'  
 289 bp

**Pre-Integration Site:**  
 Chr15 (75829308)

5' .....CCTCTAAATGTT**AATAATATTGAGACTTC**CAATAATTAATTCATTCATTCA.....3'  
 3' .....ggagattacaatt**att**ataactctgaagttattaattaagtaagtaagt.....5'

## Alu-7

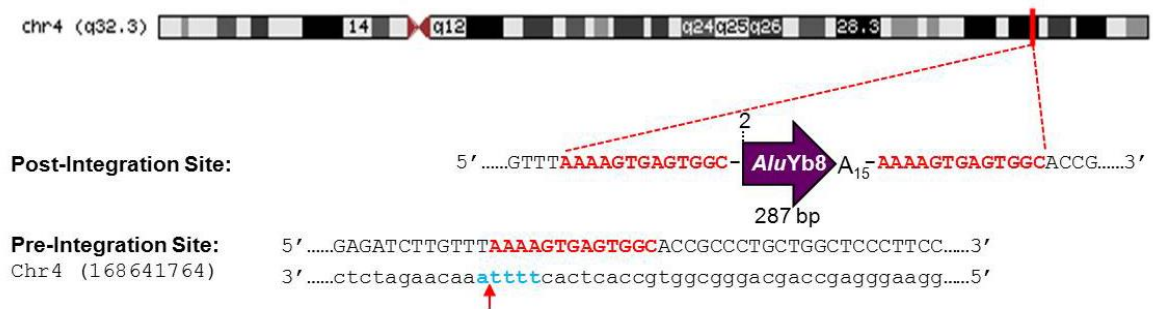

## SVA-2

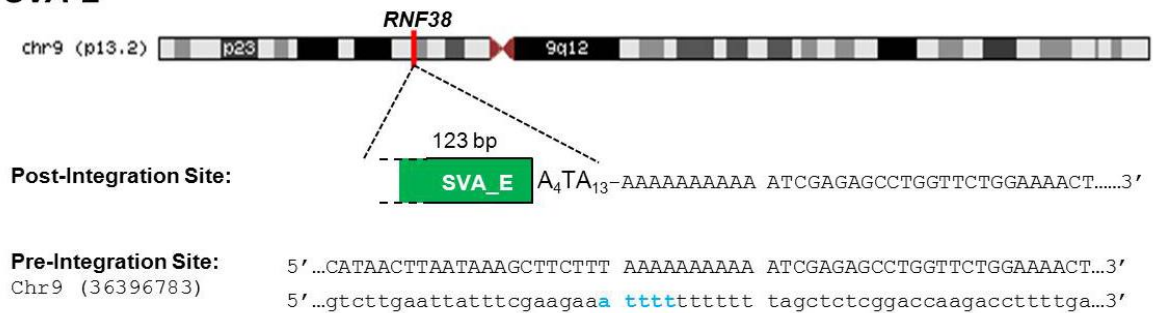

## b) De novo retrotransposition event in the hESC line H9

### Alu-2

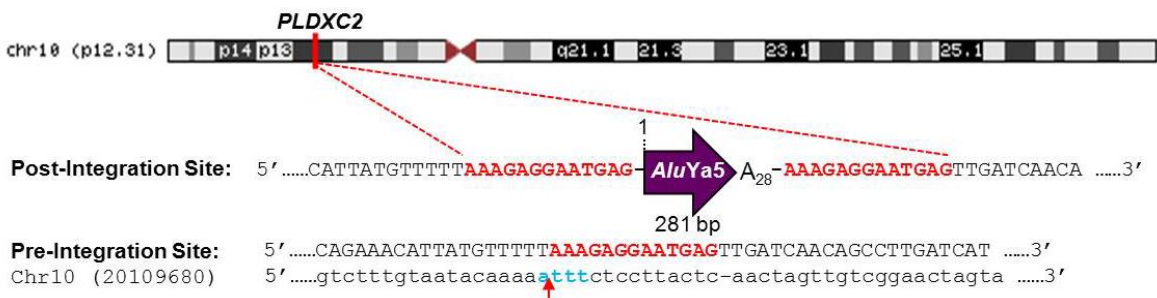

**Supplementary Figure 9: Structures of endogenous L1, *Alu* and SVA *de novo* retrotransposition events identified in human iPSC (a) and ESC (b) lines.** Chromosomal localization, and pre- and post-integration sites are presented. *De novo* insertions were identified in hiPSC lines hiPS-SB4, hiPS-SB5, hFF-iPS4 and hiPS-CRL1502 respectively. Nucleotide positions at 5' and 3' ends of L1 insertions refer to the L1 reference sequence L1.3<sup>1</sup>. L1 subfamily type and insertion lengths are indicated: L1-dn10, L1-dn6, L1-dn14 and L1-dn15 are intergenic full-length L1Ta insertions; L1-dn13, 5' truncated and 5' inverted L1Ta insertion into intron 7 of the *CADPS2* gene; L1-dn3, 5' truncated L1Ta intronic insertion into intron 2 of the *SLC12A1* gene; L1-dn4, full-length L1 pre-Ta insertion into intron 2 of the *NREP* gene incorporating a 2bp 3' truncation; L1-dn15, 5' truncated and inverted intergenic insertion; The inverted region at the 5' end of insertion L1-dn15 ranges from pos. 91-654 of the L1 reference sequence and is followed by a 25-bp sequence of unknown origin which is attached to pos. 679 of a 5'-truncated L1 Ta element. *Alu-1*, 289-bp *AluYb8* insertion into intron 1 of the *PTPN9* gene; *Alu-7*, intergenic 287-bp *AluYb8* insertion; *SVA-2*, 3' junction of the intronic *SVA<sub>E</sub>* insertion into the *RNF38* gene; *Alu-2*, *AluYa5* insertion into intron 2 of the *PLDXC2* gene; L1 EN target sequences on the bottom strands are indicated in blue. L1 EN nicking site is denoted by a red arrow. Extra deoxyguanylates at the 5' ends of *de novo* insertions are indicated in green. Nucleotides representing patches of microcomplementarity are underlined; Red lettering, TSD sequences;

L1-dn4

1 CGCAAGGGGA TGTGTCTACT GCAGTCTCTCT TCACCTGTGGA CCTGGAACAT GGCAGACAGA CAGACACTTT GATCTCCTTG CCAGTACGAC TTCATGTCTG  
101 CTGTAGTTTG GAGTAGCAGA GAGAAGGCCAA CAACTTCCTG GTTGTCTTCT GAACGTGACT TTGATAATCA GTAGGTAGAA AAGAGAGGGA ACAGTATTTT  
201 AAGAAGCTGT TTTGTTTTAT CTTTTATCCC TATCCTTAAA CTATATTTTG TTTTGTGGAT TTCGTAGTCT TTTTTCAGGT AAGGTATATT AGGCATCTTT  
TSR  
301 ATTTATCACA AAAGGCTATC ACAGTGTTC CTTTATGTA AGGAGTAAAT TGAAGGAATA GTTTTGTTTT GACAACCTTAC TGGGAGGAGC CAAGATGGCC  
401 GAATAGGAAC AGCTCCGGTC TACAGTCTCC AGCGTGAGCG ACGCAGAAGA CGGTGATTTC TGCATTTCCTA TCTGAGGTAC CGGGTTCATC TCACATAGGA  
501 GTGCCAGACA GTGGCGCAG GCCAGTGTGT GTGGCCACCG TGCCCGAGCC GAAGCAGGGC GAGGCATTGC CTCACCTGGG AAGCGCAAGG GGTCAAGGAG  
601 TTCCCTTTCT GAGTCAAAGA AAGGGGTGAC GGTGCGACCT GGAATAATCGG GTCACTCCCA CCCGAATATT GCGCTTTTCA GACCCGGTTA AGAAACGGCC  
701 CACCACGAGA CTATATCCA CACCTGGCTC GGAGGGTCTT ACGCCACGGG AATCTCGCTG ATTGCTAGCA CAGCAGTCTG AGATCAAACG GCAAGCGGGC  
801 AACGAGGCTG GGGAGGGGC GCCCGCCATT GCCCAGGCTT GCTTAGGTAA ACAAAGCAGC CGGGAAGCTC GAACCTGGGTG GAGCCCAACA CAGCTCAAGG  
901 AGGCCTGCCT GCCTCTGTAG GCTCCACCTC TGGGGGCAGG GCACAGACAA ACAAAGAGAC AGCAGTAACC TCTGCAGACT TAAGTGTCCC TGTCTGACAG  
1001 CTTTGAAGAG AGCAGTGGTT CTCCCAGCAC ACAGCTGGAG ATCTGAGAAC TGGCAGACTG CCTCCTCAAG TGGGTCCCTG ACCCTGACC CCCGAGCAGC  
1101 CTAACCTGGA GGCACCCCCC ACCAGGGGCA CACTGACACC TCACACGGCA GGGTATTCCA GCAGACCTGC AGCTGAGGGT TCTGTCTGTT  
ORF1  
M G K K Q N  
1201 CTAACAACCA GAAAGGACAT CTACACCGAA AACCCATCTG TACATACCA TCATCAAAGA CAAAAGTAG ATAAAACCA AAAGATGGG AAAAAACAGA  
ORF1  
R K T G N S K T Q S S P P P K E R S S S P A T E Q S W M E N D F  
1301 ACAGAAAAC TGAACACTCT AAAACGCAGA GCGTCTCTCC TCCTCCAAG GAACGCAGTT CCTCACCAGC AACAGAACA AGCTGGATGG AGAATGATTT  
ORF1  
D E L R E E G F R R S N Y S E L R E D I Q T K G K E V E N F E K N  
1401 TGACGAGCTG AGAGAAGAG GCTTCAGACG ATCAAATTAC TCTGAGCTAC GGGAGGACAT TCAAACCAA GGCAAGAAG TTAAGAACTT TGAAAAAAT  
ORF1  
L E E C I T R I T N T E K C L K E L M E L K T K A R E L R E E C R S  
1501 TTAGAAGAAT GTATACTAG AATAACCAAT ACAGAGAAGT GCTTAAAGGA GCTGATGGAG CTGAAAACCA AGGCTCGAGA ACTACGTGAA GAATCGACAA  
ORF1  
L R S R C D Q L E E R V S A M E D E M N E M K R E G K F R E K R I  
1601 GCCTCAGGAG CCGATGCGAT CAACTGGAAG AAAGGGTATC AGCAATGGAA GATGAAATGA ATGAAATGAA GCGAGAAGG AAGTTTAGAG AAAAAAGAA  
ORF1  
K R N E Q S L Q E I W D Y V K R P N L R L I G V P E S D V E N G T  
1701 AAAAAAGAA GAGCAAAGCC TCCAAGAAAT ATGGGACTAT GTGAAAGAGC CAAATCTACG TCTGATTGGT GTACCTGAAA GTGATGTGGA GAATGGAACC  
ORF1  
K L E N T L Q D I I Q E N F P N L A R Q A N V Q I Q E I Q R T P Q R  
1801 AAGTTGGAAC ACATCTGCA GGATATTATC CAGGAGAAT TCCTCAATCT AGCAAGGCAG GCCACGTTTC AGATTACGGA AATACAGAGA ACGCCACAAA  
ORF1  
Y S S R R A T P R H I I V R F T K V E M K E K M L R A A R E K G R  
1901 GATACTCCTC GAGAAGACA ACTCCAAGAC ACATAATTGT GAGATTACCC AAAGTTGAAA TGAAGGAAA AATGTTAAGG GCAGCCAGAG AGAAAGGTGC  
ORF1  
V T L K G K P I R L T D L S A E T L Q A R R E W G P I F N I L K  
2001 GGTTACCCTC AAAGGAAAGC CCATCAGACT AACAGCGGAT CTCTCGGCAG AAACCCTACA AGCCAGAAGA GAGTGGGGGC CAATATTCAA CATTCTTAAA  
ORF1  
E K N F Q P R I S Y P A K L S F I S E G E I K Y F I D K Q M L R D F  
2101 GAAAAGAATT TTCAACCCAG AATTTATAT CCAGCCAAAC TAAGCTTATC AAGTGAAGGA GAAATAAAAT ACTTTATAGA CAAGCAAATG CTGAGAGATT  
ORF1  
V T T R P A L K E L L K E L N M E R N N R Y Q P L Q N H A K M  
2201 TTGTACCAC CAGGCTGCC CTAAGAGAGC TCCTGAAGGA AGTCTAAGC ATGGAAGGA ACAACCGGTA CCAGCCGCTG CAAATCATG CCAAATGTA  
ORF2  
M T G S N S H I T I L T  
2301 AAGACCATCG AGACTAGGAA GAACTGCAT CAACTAATGA GCAAAATCAC CAGCTAATCAT CATAATGACA GGATCAAAT CACACATAAC AATATTAAT  
ORF2  
L N I N G L N S A I K R H R L A S W I K S Q D P S V C C I Q E T H L  
2401 TTAATATAA ATGACTAAA TTCTGCAATT AAAAGACACA GACTGGCAAG TTGGATAAAG AGTCAAGACC CATCAGTGTG CTGTATTTCAG GAAACCCATC  
ORF2  
T C R D T H R L K I G W R K I Y Q A N G K Q K K A G V A I L V S  
2501 TCACGTGCAG AGACACACAT AGGCTCAAAA TAACAGGATG GAGGAAGATC TACCAAGCAA ATGGAAGGA AAAAAAGGCA GGGTTGCAA TCCTAGTCTC  
ORF2  
D K T D F K P T K I K R D K E G H Y I M V K G S I Q Q E E L T I L  
2601 TGATAAACA GACTTTAACC CAACAAGAT CAAAAGAGAC AAAGAAGGCC ATTACATAAT GGTAAGGGA TCAATTCAAC AAGAGGAGCT AACTATCTTA  
ORF2  
N I Y A P N T G A P R F I K Q V L S D L Q R D L D S H T L I M G D F  
2701 AATATTTATG CACCAATAC AGGAGCACCC AGATTATATA AGCAAGTCTC CAGTGACCTA CAAGAGACT TAGACTCCCA CACATTAATA ATGGAGACT  
ORF2  
N T P L S T L D R S T R Q K V N K D T Q E L N S A L H Q A D L I D

2801 TTAACACCCC ACTGTCAACA TTAGACAGAT CAACGAGACA GAAAGTCAAC AAGGATACCC AGGAATTGAA CTCAGCTCTG CACCAAGCAG ACCTAATAGA  
ORF2  
· I Y R T L H P K S T E Y T F F S A P H H T Y S K I D H I V G S K A ·  
2901 CATCTACAGA ACTCTCCACC CCAATCAAC AGAATATACA TTTTTCAG CACCACCA CACATTCC AAAATTGACC ACATAGTTGG AAGTAAGCT  
ORF2  
· L L S K C K R T E I I T N Y L S D H S A I K L E R I K N L T Q S ·  
3001 CTCCTCAGCA AATGTAAG AACAGAAAT ATAACAACT ATCTCTCAGA CCACAGTGA ATCAAATAG AAATCAGGAT TAAGAATCTC ACTCAAGCC  
ORF2  
· S T T W K L N N L L L N D Y W V H N E M K A E I K M F F E T N E N ·  
3101 ACTCAACTAC ATGGAACCTG AACAACCTGC TCCTGAATGA CTCTGGTGA CATAACGAAA TGAAGGCAGA AATAAAGATG TTCTTTGAAA CCAACGAGAA  
ORF2  
· K D T T Y Q N L W D A F K A V C R G K F I A L N A Y K R K Q E R S ·  
3201 CAAAGACACC ACATACCAGA ATCTCTGGGA CGCATTCAA GCATGTGTA GAGGGAAAT TATAGCACTA AATGCCTACA AGAGAAAGCA GGAAGATCC  
ORF2  
· K I D L T S Q L K E L E K Q E Q T H S K A S R R Q E I T K I R A E ·  
3301 AAAATTGACA GCCTAACATC ACAATTAATA GAACATAGAAA AGCAAGAGCA AACACATTCA AAAGCTAGCA GAAGGCAAGA AATAACTAAA ATCAGAGCAG  
ORF2  
· L K E I E T Q K T L Q K I N E S R S W F F E R I N K I D R P L A R ·  
3401 AACTGAAGGA AATAGAGACA CAAAAACCC TTCAAAAAAT CAATGAATCC AGGAGCTGGT TTTTGTAAAG GATCAACAAA ATTGATAGAC CACTAGCAAG  
ORF2  
· L I K K K R E K N Q I D T I K N D K G D I T T D P T E I Q T T I R ·  
3501 ACTAATAAAG AAAAAAGAG AGAAGAATCA AATAGACACA ATAAAAAATG ATAAAGGGGA TATCACCACC GATCCACAG AAATACAAC TACCATCAGA  
ORF2  
· E Y Y K H L Y A N K L E N L E E M D T F L D T Y T L P R L N Q E E V ·  
3601 GAATACTACA AACACCTCTA CGCAATAAAA CTAGAAAATC TAGAAGAAAT GGATACATTC CTGCACAT ACCTCTCC AAGACTAAC CAGGAAGAAG  
ORF2  
· E S L N R P I T G S E I V A I I N S L P T K K S P G P D G F T A E ·  
3701 TTGAATCTCT GAATAGACCA ATAACAGGCT CTGAAATGT GGCAATAATC AATAGTTTAC CAACCAAAAA GAGTCCAGGA CCAGATGGAT TCACAGCCGA  
ORF2  
· F Y Q R Y E E L V P F L L K L F Q S I E K E G I L P N S F Y E A ·  
3801 ATTCTACCAG AGGTACAAGG AGGAACTGGT ACCATTCCTT CTGAAACTAT TCCAATCAAT AGAAAAAGAG GGAATCCTCC CTAATCATT TTATGAGGCC  
ORF2  
· S I I L I P K P G R D T T K K E N F R P I S L M N I D A K I L N K I ·  
3901 AGCATCATTG TGATACAAA GCCGGGCGA GACACAACA AAAAAAGAA TTTTAGACCA ATATCCTTGA TGAACATTGA TGCAAAAACT CCAATAAAAA  
ORF2  
· L A N R I Q Q H I K K L I H H D Q V G F I P G M Q G W F N I R K S ·  
4001 TACTGGCAAA CGAATCCAG CAGCACATCA AAAAGCTTAT CCACATGAT CAAGTGGGCT TCATCCTGG GATGCAAGGC TGGTCAATA TACGCAATC  
ORF2  
· I N V I Q H I N R A K D K N H M I I S I D A E K A F D K I Q Q P F ·  
4101 AATAAATGTA ATCCAGCATA TAAACAGAGC CAAAGACAAA AACCACATGA TTATCTCAAT AGATGCAGAA AAAGCCTTG ACAAAAATCA ACAACCTTC  
ORF2  
· M L K T L N K L G I D G T Y F K I I R A I Y D K P T A N I I L N G Q ·  
4201 ATGCTAAAA CTCTCAATAA ATTAGGTATT GATGGGACGT ATTTCAAAA AATAAGAGCT ATCTATGACA AACCCACGC CAATATCATA CTGAATGGGC  
ORF2  
· K L E A F P L K T G T R Q G C P L S P L L F N I V L E V L A R A I ·  
4301 AAAAATGGA AGCATTCCCT TTGAAACTG GCACAAGACA GGGATGCCCT CTCTACCCG TCCTATTCAA CATAGTGTG GAAGTCTGG CAGGGCAAT  
ORF2  
· R Q E K E I K G I Q L G K E E V K L S L F A D D M I V Y L E N P I ·  
4401 CAGGCAGGAG AAGGAAATA AGGTATTCA ATTAGAAAA GAGGAAGTCA AATGTCCCT GTTGCAGAC GACATGATTG TTTATCTAGA AAACCCCATC  
ORF2  
· V S A Q N L L K L I S N F S K V S G Y K I N V Q K S Q A F L Y T N N ·  
4501 GTCTCAGCCC AAAATCTCT TAAGCTGATA AGCAACTTCA GCAAGTCTC AGGATACAAA ATCAATGTAC AAAAATCACA AGCATTCTTA TACACCAACA  
ORF2  
· R Q T E S Q I M G E L P F I A S K R I K Y L G I Q L T R D V K D ·  
4601 ACAGACAAAC AGAGAGCAA ATCATGGTG AACTCCATT CACAATTGCT TCAAAGAGAA TAAAATACCT AGGAATCCAA CTTACAAGGG ATGTGAAGGA  
ORF2  
· L F K E N Y K P L L K E I K E D T N K W K N I P C S W V G R I N I ·  
4701 CCTCTTCAAG GAGAACTACA AACCACTGCT CAAGAAATA AAAGAGACA CAAACAATG GAAGAACATT CCATGCTCAT GGGTAGGAAG AATCAATATC  
ORF2  
· V K M A I L P K V I Y R F N A I P I K L P M T F F T E L E K T T L K ·  
4801 GTGAAAATGG CCATACTGCC CAAGTAAT TACAGATTCA ATGCCATCCC CATCAAGCTA CCAATGACTT TCTCAGACA ATTGAAAAA ACTACTTTAA  
ORF2

```

· F I W N Q K R A R I A K S I L S Q K N K A G G I T L P D F K L Y Y ·
4901 AGTTCATATG GAACCAAAAA AGAGCCCGCA TCGCCAAGTC AATCCTAAGC CAAAAGAACA AAGCTGGAGG CATCACACTA CCTGACTTCA AACTATACTA
-----
ORF2
· K A T V T K T A W Y W Y Q N R D I D Q W N R T E P S E I M P H I Y
5001 CAAGGTACA GTAACCAAAA CAGCATGGTA CTGGTACCAA AACAGAGATA TAGATCAATG GAACAGAACA GAGCCCTCAG AAATAATGCC GCATATCTAC
-----
ORF2
N Y L I F D K P E K N K Q W G K D S L F N K W C W E N W L A I C R K
5101 AACTATCTGA TCCTTGACAA ACCTGAGAAA AACAAAGCAAT GGGGAAAGGA TTCCCTATTT AATAAATGGT GCTGGGAAAA CTGGCTAGCC ATATGTAGAA
-----
ORF2
· L K L D P F L T P Y T K I N S R W I K D L N V P K T I K T L E E
5201 AGCTGAAACT GGATCCCTTC CTTACACCTT ATACAAAAAT CAATTCAAGA TGGATTAAGG ATTTAAACGT TAGACCTAAA ACCATAAAAA CCCTAGAAGA
-----
ORF2
· N L G I T I Q D I G V G K D F M S K T P K A M A T K K I D K W D
5301 AAACCTAGGC ATTACCATTG AGGACATAGG CGTGGGCAAG GACTTCATGT CCAAAACACC AAAAGCAATG GCAACA AAAA CCAAAATTGA CAAATGGGAT
-----
ORF2
L I K L K S F C T A K E T T I R V N R Q P T T W E K I F A T Y S S D
5401 CTAATTAAC TAAAGAGCTT CTGCACAGCA AAAGAAACTA CCATCAGAGT GAACAGGCAA CCTACAACAT GGGAGAAAAA TTTGCAACC TACTCATCTG
-----
ORF2
· K G L I S R I Y N E L K Q I Y K K K T N N P I K K W A K D M N R H
5501 ACAAAAGGCT AATATCCAGA ATCTACAATG AACTCAAAACA AATTTACAAG AAAAAACAA ACAACCCCAT CAAAAAGTGG GCGAAGGACA TGAACAGACA
-----
ORF2
· F S K E D I Y A A K K H M K K C S S S L A I R E M Q I K T T M R Y
5601 CTTCTCAAAA GAAGACATTT ATGCAGCCAA AAAACACATG AAGAAATGCT CATCATCACT GGCCATCAGA GAAATGCAAA TCAAAACCAC TATGAGATAT
-----
ORF2
H L T P V R M A I I K K S G N N R C W R G C G E I G T L L H C W W D
5701 CATCTCACAC CAGTTAGAA TGGCAATCATT AAAAAGTCAG GAAACAACAG GTGCTGGAGA GGATGCGGAG AAATAGGAAC ACTTTTACAC TGTTGGTGGG
-----
ORF2
· C L V Q P L W K S V W R F L R D L E L E I P F D P A I P L L G I
5801 ACTGTCAACT AGTTCAACCA TTGTGGAAGT CAGTGTGGCG ATTCCTCAGG GATCTAGAAC TAGAAATACC ATTTGACCCA GCCATCCCAT TACTGGGTAT
-----
ORF2
· Y P K L Y K S C C Y K D T C T R M F I A A L F T I A K T W N Q P K
5901 ATACCCAAAG GACTATAAAT CATGTGCTA TAAAGACACA TGACACAGTA TGTTTATTGC GGCACATATC ACAATAGCAA AGACTTGGA CCAACCCAAA
-----
ORF2
C P T M I D W I K K M W H I Y T M E Y Y A A I K N D E F I S F V G T
6001 TGTCACAAAC TGATAGACTG GATTAAGAAA ATGTGGCACA TATACACCAT GGAATACTAT GCAGCCATAA AAAATGATGA GTTCATATCC TTTGTAGGGA
-----
ORF2
· W M K L E T I I L S K L S Q E Q K T K H R I F S L I G G N
6101 CATGGATGAA ATTGGAAACC ATCATTCTCA GTAACTATC GCAAGAACA AAAACCAAC ACCGCATATT CTCACCTATA GGTGGGAAT GAACAATGAG
6201 ATCACATGGA CACAGGAAGG GGAATATCAC ACTCTGGGGA CTGTGTGGG GTCGGGGGAG GGGGGAGGGA TAGCATTTGG AGATATACCT AATGCTAGAT
TSD
6301 GACACATTAG TGGGTGAGC GCACCAGCAT GGCACATGTA TACATATGTA ACTAACCTGC ACAATGTGCA CATGTACCTT AAAACTTAGA TTATACTTAC
TSD
6401 TGTGCTATTC TTGTAGAGTG GCTCAGCAGT GGAATTTTT CTTTGAATGC AGTAGTTCAG ATTGGGATGT ACACCTTGATT CTTCTTCTT CACTGTAAT
6501 CTGTAAAGTT TCCATGAAGC CCAAGTTAAT TGAACATGTA ATGATCTACT CCCACAGGAA ATAAAGAGTC AGATTCCCTA AAGCCGTGA TAACAGTATT
6601 TTTGTCCAGC TGATCAAAAC ATAACCTTGT CTTATATGTG TTTCTTTTTA AAGATAACGT ATTTAATCAT GTATCATTGA TTCATTAAC TTGGACTCAT
6701 GGGCAACAGC ATGAATGAAG CTTATCCADT TTTCTCCATA AGGCACATAG CAGCCCTCTT GTGCTCAGGA ACACCTAGATA GAGTTTCTG TATTACACTT
6801 GGGGACCATT TTAACAGCA AAATCACCAC CAAAAAGCAC AAAAAATCAA CATAACCTGG TACTAAATAG ATCATGAAAA GGACACTTGT TTACGGTAAG
6901 AGCTGAAACA ACAGAGGTAG AATATTGCCT TGTTTGACCT CAGCTGTGCA CTTGCACGTG CCGGCAACTG AACTTTTTTT TTGCCACACT GTGCTAATGA
7001 CCACATAATG TCACAGACAT GCTGCAAAATA CTGDATTTC GGGTTACAAA TAAATTTAAG TGAGTAGGCA ACTTCCCAA TATGGAATCC ACACAATAAT
7101 GAGGATTTCC CAGACTGTAA TGCTGGGAA AAAATGCTGA TTGCTCTAAA GTABCTTTA AAAGGGAAAT TGATGCTTTG GTTATGATG CCGTGGCTGT
7201 CCAGAAATGA TAGCCTCCTT GTATTTTTCC TACTCCATCA TTCCAGAGGA GACAGGATCA GAATCTCTGC CCCCTTGAGC CTACTTTTTG CATCAGATGT
7301 TTGCTGTGAG AGTATGAGTC GTAAAA

```

## L1-dn6-5.4

```

1 CGGAATTCGA TTAAGAGATT GGAAACAGT TGCAGACAT GAAATGAAGA TAGATTTTAT ATACATGAAA AGATGTTTCC TCTCACATAT GAGAAAAACG
-----
5'TSD
101 CAATTTAAAA CTATACTCAG GGGGAGGAGC CAAGATGGCC GAATAGGAAC AGCTCCGGTC TACAGCTCCC TCGGTGAGCG ACGCAGAAGA CGGTGATTTT
201 TGCAATTTCCA TCTGAGGTAC CGGGTTTATC TCACATAGGA GTGCCAGACA GTGGGCGCAG GCCAGTGTGT GTGCGCACCG TGCCGAGGCC GAAGCAGGGC
301 GAGGCATTGC CTCACCTGGG AAGCGCAAGG GGTCAAGGAG TTCCCTTTCC GAGTCAAAGA AAGGGGTGAC GGACGCACCT GGAAAAATCGG GTCACCTCCA
401 CCCGAATATT GTGCTTTTCA GACCAGGCTTA AGAACCGGCG CACCACGAGA CTATATCCCA CACCTGGCTC GGAGGGTCCCT ACGCCATGAG AATCTCGCTG
501 ATTGCTAGCA CAGCAGTCTG AGATCAAAC TCAAGGCGCG AACGAGGCTG GGGGAGGGGC GCCCGCCATT CCCCAGGCTT GCTTAGGTAA ACAAGCAGC
601 CGGGAGGCTC GAAGTGGGTG GAGCCCAACA CAGCTCAAGG AGGCTTGCTT GCCTCTGTAG GCTCCACCTC TGGGGGAGG GCACAGACAA ACAAAAGAC
701 AGCAGTAACC TCTGCAGACT TAAGTGTCCC TGTCTGACAG CTTTGAAGAG AGCAGTGGTT CTCCAGCAC GCAGCTGGAG ATCTGAGAAC GGGCAGACTG
801 CCTCCTCAAG TGGGTCCCTG ACTCCTGACC CCGGAGCAGC CTAATCGGGA GGCACCCCCC AGCAGGGGGA CACTGACACC TCACACGGA GGGTATTCCA
901 ACAGACTGCG AGCTGAGGTT CTTGCTGTTT AGAAGGAAAA CTAACAACCA GAAAGGCAT CTACACCGAA AACCCATCTG TACATCACA TCATCAAGA

```

ORF1

1001 CCAAAAGTAG ATAAACCAC AAAGATGGGG AAAAAACAGA ACAGAAAAAC TGGAACTCT AAAACACAGA GCGCCTCTCC TCCTCCAAG GAACGCGATT

ORF1

1101 CCTCACCAGC AACAGAACAA AGCTGGATGG AGAATGATTT TGACGAGGTG AGAGAAGAAG GCTTCAGACG ATCAAATTAC TCTGAGCTAC GGGAGGACAT

ORF1

1201 TCAAAACCAA GGCAAGAAG TTGAAAACCT TGAAAAAAAT TTAGAAGAAT GTATAACTAG AATAACCAAT ACAGAGAAGT GCTTAAAGGA GCTGATGGAG

ORF1

1301 CTGAAAACCA AGGCTCGAGA ACTACGTGAA GAATGCAGGA GCCTCAGGAG CCGATGCGAT CAACTGGAAG AAAGGTATC AGCAATGGAA GATGAAATGA

ORF1

1401 ATGAAATGAA GCGAGAAGG AAGTTTAGAG AAAAAAGAAT AAAAAGAGAT GAGCAAAGCC TCCAAGAAAT ATGGGACTAT GTGAAAAGAC CAAATCTACG

ORF1

1501 TCTGATTGGT GTACCTGAAA GTGATGGGGA GAATGGAACC AAGTTGGAAG ACACCTCTGCA GGATATTATC CAGGAGAAGT TCCCAATCT AGCAAGGCGAG

ORF1

1601 GCCAACGTTC AGATTCAGGA AATACAGAGA ACGCCACAAA GATACTCCTC GAGAAGAGCA ACTCCAAGAC ACATAATTGT CAGATTCACC AAAGTTGAAA

ORF1

1701 TGAAGGAAAA AATGTTAAGG GCAGCCAGAG AGAAAAGTGC GGTACCCTC AAAGGAAAGC CCATCAGACT AACAGCGGAT CTCTCGGAG AAACCTTACA

ORF1

1801 AGCCAGAAGA GAGTGGGGGC CAATATTCAA CATTCTTAAA GAAAAGAATT TTCAACCCAG AATTTATAT CCAGCCAAAC TAAGTTCAT AAGTGAAGGA

ORF1

1901 GAAATAAAAT ACTTTATAGA CAAGCAAATG TTGAGAGATT TTGTCAACC CAGGCCTGCC CTAAAAGAGC TCCTGAAGGA AGCGTAAAC ATGGAAGGGA

ORF1

2001 ACAACCGGTA CCAGCCGCTG CAAAATCATG CAAAATGTA AAGACCATCG AGACTAGGAA GAAACTGCAT CAACTAATGA GAAAATCAC CAGCTAACAT

ORF2

2101 CATAATGACA GGATCAAATT CACACATAAC AATATTAAC TTAATAATAA ATGGACTAAA TTCTGCAATT AAAAGACACA GACTGGCAAG TTGGATAAAG

ORF2

2201 AGTCAAGACC CATCAGTGTG CTGTATTCAG GAAACCCATC TCACGTGACG AGACACACAT AGGCTCAAAA TAAAAGGATG GAGGAAGATC TACCAAGCCA

ORF2

2301 ATGGAAAACA AAAAAAGGCA GGGGTTGCAA TCCTAGTCTC TGATAAAACA GACTTTAAAC CAACAAGAT CGAAAAGAGC AAAGAAGGCC ATTACATAAT

ORF2

2401 GGTAAGGGA TCAATTCAAC AAGAGGAGCT AACTATCCTA AATATTTATG CACCAATAC AGGAGCACCC AGATTATAA AGCAAGTCTC CAGTGACCTA

ORF2

2501 CAAAGAGACT TAGACTCOCA CACATTAATA ATGGGAGACT TTAACACCCC ACTGTCAACA TTAGACAGAT CAACAAGACA GAAAGTCAAC AAGGATACCC

ORF2

2601 AGGAATTGAA CTCAGTCTCG CACCAAGCAG ACCTAATAGA CATCTACAGA ACTCTCCACC CCAAATCAAC AGAATATAA TTTTTTTCAG CACCACACCA

ORF2

2701 CACCTATTCC AAAATTGACC ACATAGTTGG AAGTAAAGCT CTCCTCAGCA AATGTAAAAG AACAGAAAT ATAACAACT ATCTCTCAGA CCACAGTGCA

ORF2

2801 ATCAAACCTAG AACTCAGGAT TAAGATCTC ACTCAAAGCC GCGCAACTAC ATGGAAACTG AACACCTGTC TCCTGAATGA CTACTGGGTA CATAACGAAA

ORF2

K A E I K M F F E T N E N K D T T Y Q N L W D A F K A V C R G K F



2901 TGAAGGCAGA AATAAAGATG TTCTTTGAAA CCAACGAGAA CAAAGACACC ACATACCAGA ATCTCTGGGA CGCATTCAAA GCAGTGTGTA GAGGGAATTT  
-----  
ORF2  
-----  
· I A L N A Y K R K Q E R S K I D T L T S Q L K E L E K Q E Q T H S ·  
-----  
3001 TATAGCACTA AATGCCTACA AGAGAAAGCA GGAAAGATCC AAAATTGACA CCTAACATC ACAATTAAAA GAAC TAGAAA AGCAAGAGCA AACACATTCA  
-----  
ORF2  
-----  
· K A S R R Q E I T K I R A E L K E I E T Q K T L Q K I N E S R S W F ·  
-----  
3101 AAAGCTAGCA GAAGGCAAGA AATAACTAAA ATCAGAGCAG AACTGAAGGA AATAGAGACA CAAAAAACC TTCAAAAAAT CAATGAATCC AGGAGCTGTT  
-----  
ORF2  
-----  
· F E R I N K I D R P L A R L I K K K R E K N Q I D T I K N D K G D ·  
-----  
3201 TTTTGAAGG GATCAACAAA ATTGATAGAC CGCTAGCAAG ACTAATAAAG AAAAAAGAG AGAAGAAATCA AATAGACACA ATAAAAAATG ATAAAGGGGA  
-----  
ORF2  
-----  
· I T T D P T E I Q T T I R E Y Y K H L Y A N K L E N L E E M D T F ·  
-----  
3301 TATCACCACC GATCCACAG AAATACAAC TACCATCAGA GAATACTACA AACACCTCTA CGCAAAATAA CTAGAAAATC TGGAAGAAAT GGATGATCTC  
-----  
ORF2  
-----  
· L D T Y T L P R L N Q E E V E S L N R P E T G S E I V A I I N S L P ·  
-----  
3401 CTCGACACAT ACATCTCC CAACTAAAC CAGGAAGAAG TTGAATCTCT GAATCGACCA ACAACAGGCT CTGAAATGTT GGCAATAATC AATGATTTAC  
-----  
ORF2  
-----  
· T K K S P G P D G F T A E F Y Q R Y E E E L V P F L L K L F Q S I ·  
-----  
3501 CAACCAAAAA GAGTCCAGGA CCAGATGGAT TCACAGCCGA ATTCTACCAG AGGTACAAGG AGGAACTGGT ACCATTCCCT CTGAAACTAT TCCAATCAAT  
-----  
ORF2  
-----  
· E K E G I L P N S F Y E A S I I L I P K P G R D T T K K E N F R P ·  
-----  
3601 AGAAAAAGAG GGAATCTCC CTAATCATT TTATGAGGCC AGCATCATTG TGATACCAAA GCCGGGCAGA GACACAACCA AAAAAAGAGAA TTTTAGACCA  
-----  
ORF2  
-----  
· I S L M N I D A K I L N K I L A N R I Q Q H I K K L I H H D Q V G F ·  
-----  
3701 ATATCCTTGA TGAACATGA TGCAAAAATC CTCAATAAAA TACTGGCAAA CGAATCCAG CAGCACATCA AAAAGCTTAT CCACCATGAT CAAGTGGGCT  
-----  
ORF2  
-----  
· I P G M Q G W F N I R K S I N V I Q H I N R A K D K N H M I I S I ·  
-----  
3801 TCATCCCTGG GATGCAAGC TGGTTCAATA TACGCAATC AATAAATGTA ATCCAGCATA TAAACAGAGC CAAAGACAAA AACACATGA TTATCTCAAT  
-----  
ORF2  
-----  
· D A E K A F D K I Q Q P F M L K T L N K L G I D G T Y F K I I R A ·  
-----  
3901 AGATGCAGAA AAAGCCTTTG AAAAAATCA ACAACCCCTC ATGCTAAAAA CTCTCAATAA ATTAGGTATT GATGGGAGCT ATTTCAAAAT AATAAGAGCT  
-----  
ORF2  
-----  
· I Y D K P T A N I I L N G Q K L E A F P L K T G T R Q G C P L S P L ·  
-----  
4001 ATCTATGACA AACCCACAGC CAATATCATA CTGAATGGGC AAAAATGGA AGCATTCCCT TTGAAAATG GCACAAGACA GGGATGCCCT CTCTCACCGC  
-----  
ORF2  
-----  
· L F N I V L E V L A R A I R Q E K E I K G I Q L G K E E V K L S L ·  
-----  
4101 TCCTATTCAA CATAGTGTGG GAAGTTCTGG CCAGGGCAAT CAGGCAGGAG AAGGAAATAA AGGGTATTCA ATTAGGAAA GAGGAAGTCA AATTGTCCCT  
-----  
ORF2  
-----  
· F A D D M I V Y L E N P I V S A Q N L L K L I S N F S K V S G Y K ·  
-----  
4201 GTTTCAGAC GACATGATTG TTTATCTAGA AAACCCCATC GTCTCAGCCC AAAATCTCCT TAAGCTGATA AGCAACTTCA GCAAGTCTC AGGATACAAA  
-----  
ORF2  
-----  
· I N V Q K S Q A F L Y T N N R Q T E S Q I M E E L P F E I A S K R I ·  
-----  
4301 ATCAATGTAC AAAAATCACA AGCATTCTTA TACACCAACA ACAGACAAC AGAGAGCCAA ATCATGAGTG AACTCCCAT CACAATGCT TCAAAGAGAA  
-----  
ORF2  
-----  
· K Y L G I Q L T R D V K D L F K E N Y K P L L K E I K E E T N K W ·  
-----  
4401 TAAAAACCT AGGAATCCAA CTTACAAGGG ATGTGAAGGA CCTCTTCAAG GAGAACTACA AACCCTGCT CAAGGAAATA AAAGAGGAGA CAAACAAATG  
-----  
ORF2  
-----  
· K N I P C S W V G R I N I V K M A I L P K V I Y R F N A I P I K L ·  
-----  
4501 GAAGAACATT CCATGCTCAT GGGTAGGAAG AATCAATATC GTGAAAATGG CCATACTGCC CAAGGTAATT TACAGATTCA ATGCCATCCC CATCAAGCTA  
-----  
ORF2  
-----  
· P M T F F F T E L E K T T L K F I W N Q K R A R I A K S I L S Q K N K ·  
-----  
4601 CCAATGACTT TCTTCACAGA ATTGGAAAAA ACTACTTTAA AGTTCATATG GAACCAAAAA AGAGCCCGCA TTGCCAAGTC AATCCTAAGC CAAAAGAAC  
-----  
ORF2  
-----  
· A G G I T L P D F K L Y Y K A T V T K T A W Y W Y Q N R D I D Q W ·  
-----  
4701 AAGCTGGAGG CATCACACTA CCTGACTTCA AACTATACTA CAAGGCTACA GTAACCAAAA CAGCATGGTA CTGGTACCAA AACAGAGATA TAGATCAATG  
-----  
ORF2  
-----  
· N I T E P S E I M P H I Y N Y L I F D K P E K N E Q W G K D S L F ·  
-----  
4801 GAACATAACA GAGCCCTCAG AAATAATGCC GCATATCTAC AACTATCTGA TCTTTGACAA ACCTGAGAAA AACAGCAAT GGGGAAAGGA TTCCCTGTTT  
-----  
ORF2  
-----  
· N K W C W E N W L A I C R K L K L D P F L T P Y T K I N S R W I K D ·

```

4901 AATAAATGGT GCTGGGAAAA CTGGCTAGCC ATATGTAGAA AGCTGAAACT GGATCCCTTC CTTACACCTT ATACAAAAAT CAATTCAAGA TGGATTAAG
-----
ORF2
· L N V K P K T I K T L E E N L G I T I Q D I G V G K D F M S K T P ·
5001 ATTTAAACGT TAAACCTAAA ACCATAAAAA CCCTAGAAGA AAACCTAGGC ATTACCATT CAGGACATAGG CGTGGGCAAG GACTTCATGT CCAAAACACC
-----
ORF2
· K A M A T K D K I D K W D L I K L K S F C T A K E T T I R V N R Q ·
5101 AAAAGCAATG GCAACAAAAG ACAAATTTGA CAAATGGGAT CTAATTAAC TAAAGAGTTT CTGCACAGCA AAAGAACTA CCATCAGAGT GAACAGGCAA
-----
ORF2
P T T W E K I F A T Y S S D K G L I S R I Y N E L K Q I Y K K K T N ·
5201 CCTACACAT GGGAGAAAAA TTTTGCAACC TACTCATCTG ACAAGGGCT AATATCCAGA ATCTACAATG AACTCAAACA AATTTACAAG AAAAAACAAA
-----
ORF2
· N P I K K W A K D M N R H F S K E D I Y A A K K H M K K C S S S L ·
5301 ACAACCCAT CAAAAGTGG GCGAAGGACA TGAACAGACA CTTCTCAAAA GAAGACATTT ATGCAGCCAA AAAACACATG AAGAAATGCT CATCATCACT
-----
ORF2
· A I R E M Q I K T T M R Y H L T P V R M A I I K K S G N N R C W R ·
5401 GGCCATCAGA GAAATGCAA TCAAAACCAC TATGAGATAT CATCTCACAC CAGTTAGAAT GGCAATCATT AAAAGTCAG GAAACAACAG GTGCTGGAGA
-----
ORF2
G C G E I G T L L H C W W D C K L V Q P L W K S V W R F L R D L E L ·
5501 GGATGCGGAG AAATAGGAAC ACTTTTACAC TGTTGGTGGG ACTGTAAACT AGTCAACCA TTGTGGAAGT CAGTGTGGCG ATTCTCAGG GATCTAGAAC
-----
ORF2
· E I P F D P A I P L L G I Y P N E Y K S C C Y K D T C T R M F I A ·
5601 TAGAAATACC ATTTGACCCA GCCATCCCAT TACTGGGTAT ATACCCAAAT GAGTATAAAT CATGCTGCTA TAAAGACACA TGCACACGTA TGTTTATTGC
-----
ORF2
· A L F T I A K T W N Q P K C P T M I D W I K K M W H I Y T M E Y Y ·
5701 GGCACATTC ACAATAGCAA AGACTTGGAA CCAACCCAAA TGCCAACAA TGATAGACTG GATTAAGAAA ATGTGGCACA TATACCCAT GGAATACTAT
-----
ORF2
A A I K S D E F I S F V G T W M K L E T I I L S K L S Q E Q K T K H ·
5801 GCAGCCATAA AAAGTGATGA GTTCATATCC TTTGTAGGGA CATGGATGAA ATTGGAAACC ATCATTCTCA GTAACATATC GCAAGAACAA AAAACCAAAC
-----
ORF2
· R I F S L I G G N ·
5901 ACCGCATATT CTCACATATA GGTGGGAATT GAACAATGAG ATCACATGGA CACAGGAAGG GGAATATCAC ACTCTGGGGA CTGTGGTGGG GTCGGGGGAG
6001 GGGGGAGGGA TAGCATTGGG AGATATACCT AATGCTAGAT GACACATTAG TGGGTGCAGC GCACCAGCAT GGCACATGTA TACATATGTA ACTAACCTGC
6101 ACAATGTGCA CATGTACCCT AAAACTTAGA GTATAATAAA AAAAAAAAAA AAAAAAAAAA AAAAAAAAAA AAAAAAAAAA AAAAAAAAAA AAAAAAAAAA
-----
3'TSD
6201 AAAAATATA CtcAATGCTA TCTTTCATAT TTCATGTTGG CAAAACATGA AAAATCTCAC ATAAATTTTGC TTTTATGAAG CAAAGCTTTT ATGAAGCAAA
6301 CCTTTTATGA AGCAAAACTG AATAATGCAA GATACAAACG AAGGCTTATT TGTTTTAAAAA TGAATAAAAA GAAATATATA TTCTAACAGA CTTTGTGATG
6401 TCTTTAGGTT TTTCTAAATA TAAGATTATG TCCTCTGTGA ACAAGAATAA TTGGACTTAT TCCAAAGTTG CAGG

```

L1-dn6-2.2

1 CGGAATTCGA TTAAAAGATT GGAAAACAGT TGCAGAACAT GAAATGAAGA TAGATTTTAT ATACATGAAA AGATGTTTCAG TCTCACATAT GAGAAAAACG  
5' TSD  
101 CAATTTAAAA CTATACTGG GGGGAGGAGC CAAGATGGCC GAATAGGAAC AGCTCCGGTC TACAGTCCC TGCGTGAGCG ACGCAGAAGA CGGTGATTTC  
201 TGCAATTTCCA TCTGAGGTAC CGGGTTTCAT TCACTAGGGA GTGCCAGACA GTGGGCGCAG GCCAGTGTGT GTGCGCACCG TGCCGCGAGCC GAAGCAGGGC  
301 GAGCAATTCG CTCACCTGGG AAGCGCAAGG GGTCAAGGAG TTCCCTTTCC GAGTCAAAGA AAGGGGTGAC GGACGCACCT GGAAAATCGG GTCACTCCCA  
401 CCCGAATATT GCGCTTTTCA GACCGGCTTA AGAAACGGCC CGCCACGAGA CTATATCCCA CACCTGGCTC GGAGGGTCTT ACGCCCATGG AATCTCGCTG  
501 ATTGCTAGCA CAGCAGTCTG AGATCAAAC TCAAGGCGGC GCAAGGCGGC AACGAGGCTG GGGGAGGGGC GCCCGCCATT GCCCAGGCTT GCTTAGGTAA ACAAAAGCAG  
601 CGGGAAGCTC GAAGTGGGTG GAGCCACCA CAGCTCAAGG AGGCTCGCTT GCCTCTGTAG GCTCCACCTC TGGGGGCGAG GCACAGACAA ACAAAAGCAG  
701 AGCAGTAACC TCTGCAGACT TAAGTGTCCC TGTCTGACAG CTTTGAAGAG AGCAGTGGTT CTCCAGCAC GCAGCTGGAG ATCTGAGAAC GGGCAGACTG  
801 CCCCTCAAG TGGGTCCTG ACTCTGACC CCCGAGCAGC CTAACCTGGGA GGCACCCCC AGCAGGGGCA CACTGACACC TCACACGGCA GGGTATTCCA  
901 ACAGACCTGC AGTGAGGGC CCTGTCTGTT AGAAGGAAAA CTAACAACCA GAAAGGACAT GAAAGGACAT CTACACCGAA AACCCATCTG TACATACCA TCATCAAAGA  
Orf1  
M G K K Q N R K T G N S K T Q S A S P P P K E R S S  
1001 CCAAAGTAG ATAAAACCAC AAAGATGGGG AAAAACACAGA ACAGAAAAAC TGAAAACCTCT AAAACACAGA GCGCCTCTCC TCCTCCAAAG GAACGAGTT  
Orf1  
S P A T E Q S W M E N D F D E L R E E G F R R S N Y S E L R E D I  
1101 CCTCACCAGC AACAGAACAA AGCTGGATGG AGAATGATTT TGACGACGTG AGAGAAGAAG GCTTCAGACG ATCAAATTAC TCTGAGTAC GGGAGGACAT  
Orf1  
Q T K G K E V E N F E K N L E E C I T R I T N T E K C L K E L M E  
1201 TCAAACCAA GGCAAGAAG TTGAAAAC TGA AAAAAT TTAGAAGAA GTATAACTAG AATAACCAAT ACAGAGAAGT GCTTAAAGGA GCTGATGGAG  
Orf1  
L K T K A R E L R E E C R S L R S R C D Q L E E R V S A M E D E M N  
1301 CTGAAAACCA AGGCTCGAGA ACTACGTGAA GAATGCAGGA GCCTCAGGAG CCGATGCGAT CAACTGGAAG AAAGGGTATC AGCAATGGAA GATGAAATGA  
Orf1  
E M K R E G K F R E K R I K R N E Q S L Q E I W D Y V K R P N L R  
1401 ATGAAATGAA GCGAAGAAGG AAGTTTAGAG AAAAAGAAT AAAAGAAT GAGCAAAGC TCCAAGAAAT ATGGGACTAT GTGAAAAGAC CAAATCTACG  
Orf1  
L I G V P E S D E N G T K L E N T L Q D I I Q E N F P N L A R Q  
1501 TCTGATGTT GTACCTGAAA GTGATGGGA GAATGGAACC AAGTTGAAA ACACCTCTGCA GGATATTATC CAGGAGAATC TCCCAATC AGCAAGGCAG  
Orf1  
A N V Q I Q E I Q R T P Q R Y S S R R A T P R H I I V R F T K V E M  
1601 GCCAACGTTG AGATTCAGGA AATACAGAGA ACGCCACAAA GATACTCTCT GAGAAGAGCA ACTCCAAGAC ACATAATTGT CAGATTACCC AAAGTTGAAA  
Orf1  
K E K M L R A A R E K G R V T L K G K P I R L T D L S A E T L Q  
1701 TGAAGAAAA AATGTTAAGG GCAGCCAGAG AGAAAGGTGC GTTACCCTC AAAGGAAAGC CCATCAGACT AACAGCGGAT CTCTCGGCAG AAACCTTACA  
Orf1  
A R R E W G P I F N I L K E K N F Q P R I S Y P A K L S F I S E G  
1801 AGCCAGAAGA GAGTGGGGG CAATATTCAA CATCTTAAA GAAAAGAATT TTCAACCCAG AATTTCATAT CCAGCCAAAC TAAGCTTAC AAGTGAAGGA  
Orf1  
E I K Y F I D K Q M L R D F V T T R P A L K E L L K E A L N M E R N  
1901 GAAATAAAAT ACTTTATAGA CAAGCAAATG TTGAGAGATT TTGTCAACC CAGGCTGACC CTAAGAGAGC TCCTGAAGGA AGCGCTAAC ATGGAAGGA  
Orf1  
R Y Q P L Q N H A K M  
2001 ACTACCGGTA CCAGCCGCTG CAAATCATG CCAAAATGTA AAGACCATCG AGACTAGGAA GAAACTGCAT CAACTAATGA GCAAAATCAC CAGCTAACAT  
Orf2  
M T G S N S H I T I L T L N I N G L N S A I K R H R L A S W I K  
2101 CATAATGACA GGATCAAATT CACACATAAC AATATTAAC TTAATATAA ATGGACTAAA TTCTGCAATT AAAAGACACA GACTGGCAAG TTGGATAAAG  
Orf2  
S Q D P S V C C I Q E T H L T C R D T H R L K I K G W R K I Y Q A N  
2201 AGTCAAGACC CATCAGTGTG CTGTATTACG GAAACCCATC TCACGTGACG AGACACACAT AGGCTCAAAA TAAAGGATG GAGGAAGATC TACCAAGCCA  
Orf2  
G K Q K K A G V A I L V S D K T D F K P T K I K R D K E G H Y I M  
2301 ATGGAACA AAAAAGGCA GGGTTGCA TCTAGTCTC TGATAAACA GACTTAAAC CAACAAGAT CAAAAGAGAC AAAGAAGGCC ATTACATAAT  
Orf2  
V K G S I Q Q E E L T I L N I Y A P N T G A P R F I K Q V L S D L  
2401 GGTAAGGGA TCAATTCAC AAGAGGAGCT AACTATCCTA AATATTATG CACCAATAC AGGAGCACCC AGATTCAATA AGCAAGTCTC CAGTGACCTA  
Orf2  
Q R D L D S H T L I M G D F N T P L S T L D R S T R Q K V N K D T Q  
2501 CAAAGAGACT TAGACTCCA CACATTAATA ATGGGAGACT TTAACACCCC ACTGTCAACA TTAGACAGAT CAACRAGACA GAAAGTCAAC AAGGATACCC  
Orf2  
E L N S A L H Q A D L I D I Y R T L H P K S T E Y T F F S A P H H  
2601 AGGAATGAA CTCAGTCTG CACCAAGCAG ACCTAATAGA CATCTACAGA ACTCTCCACC CCAATCAAC AGAATATACA TTTTTTTCAG CACCACACCA  
Orf2  
T Y S K I D H I V G S K A L L S K C K R T E I I T N Y L S D H S A  
2701 CACCTATCC AAAATTGACC ACATAGTTGG AAGTAAAGCT CTCCTCAGCA AATGTAAG AACAGAAAT ATAACAACT ATCTCTCAGA CCACAGTGA  
Orf2  
I K L E L R I K N L T Q S R T T W K L N N L L L N D Y W V H N E M

2801 ATCAAAGTAC AACTCAGGAT TAAGAATCTC ACTCAAAGCC GCGCAACTAC ATGGAACTG ACAAACCTGC TCCTGAATGA CTACTGGGTA CATAACGAAA  
Orf2  
· K A E I K M F F E T N E N K D T T Y X N L W D A F K A V C R G K F ·

2901 TGAAGGCAGA AATAAAGATG TTCTTTGAAA CCAACGAGAA CAAAGACACC ACATACCAGA ATCTCTGGGA CGCATTCAA GCAGTGTGA GAGGGAAATT  
Orf2  
· I A L N A Y Q R K Q E R S K I D T L T S Q L K E L E K Q E Q T H S ·

3001 TATAGCACTA AATGCCTACC AGAGAAAGCA GGAAGATCC AAAATTGACA CCCTAACATC ACAATTAAAA GAAC TAGAAA AGCAAGAGCA AACACATCA  
Orf2  
· K A S R R Q E I T K I R A E L K E I E T Q K T L Q K I N E S R S W F ·

3101 AAAGCTAGCA GAAGGCAAGA AATAACTAAA ATCAGAGCAG AACTGAAGGA AATAGAGACA CAAAAAACC TTCAAAAAT CAATGAATCC AGGAGCTGGT  
Orf2  
· F E R I N K I D R P L A R L I K K K R E K N Q I D T I K N D K G D ·

3201 TTTTGAAGG GATCAACAAA ATTGATAGAC CGTAGCAAG ACTAATAAAG AAAAAAAGAG AGAAGAATCA AATAGACACA ATAAAAAATG ATAAAGGGGA  
Orf2  
· I T T D P T E I Q T T I R E Y Y K H L Y A N K L E N L E E M D T F ·

3301 TATCACCACC GATCCACAG AAATACAAAC TACCATCAGA GAATACTACA AACACCTCTA CGCAAATAAA CTAGAAAAAT TGAAGAAAT GGATACATC  
Orf2  
· L D T Y T L P R L N Q E E V E S L N R P I T G S E I V A I I N S L P ·

3401 CTCGACACAT ACACCTCC AAGACTAAC CAGGAAGAAG TTGAATCTCT GAATCGACCA ATAACAGGCT CTGAAATGTG GGCAATAATC AATAGTTTAC  
Orf2  
· T K K S P G P D G F T A E F Y Q R Y X E E L V P F L L K L F Q S I ·

3501 CAACCAAAA GAGTCCAGGA CCAGATGGAT TCACAGCCGA ATTCTACCAG AGGTACAAGG AGGAACTGGT ACCATTCCTT CTGAAACTAT TCCAATCAAT  
Orf2  
· E K E G I L P N S F Y E A S I I L I P K P G R D T T K K E N F R P ·

3601 AGAAAAAGG GGAATCCTCC TAACTCAT TTATGAGGCC AGCATCATT TGATACAAA GCCGGGCAGA GACACAACA AAAAAGAGAA TTTTAGACCA  
Orf2  
· I S L M N I D A K I L N K I L A N R I Q Q H I K K L I H H D Q V G F ·

3701 ATATCTTGA TGAACATTGA TGCAAAAATC CTCAATAAAA TACTGGCAAA CCGAATCCAG CAGCACATCA AAAAGCTTAT CCACCATGAT CAAGTGGGCT  
Orf2  
· I P G M Q G W F N I R K S I N V I Q H I N R A K X K N H M I I S I ·

3801 TCATCCCTGG GATGCAAGGC TGGTCAATA TACGCAATC AATAAATGTA ATCCAGCATA TAAACAGAGC CAAAGRCAA AACCACATGA TTATCTCAAT  
Orf2  
· D A E K A F D K I Q Q P F M L K T L N K L G I D G T Y F K I I R A ·

3901 AGATGCAGAA AAAGCCTTG ACAAAAATTCA ACAACCTTC ATGCTAAAAA CTCTCAATAA ATTAGTATT GATGGGACGT ATTCAAAAT AATAAGAGCT  
Orf2  
· I Y D K P T A N I I L N G Q K L E A F P L K T G T R Q G C P L S P L ·

4001 ATCTATGACA AACCCACAG CAATATCATA CTGAATGGGC AAAAAGTGA AGCATTCCTT TGAAAAGTGC GCACAAGACA GGGATGCCCT CTCTACCAGC  
Orf2  
· L F N I V L E V L A R A I R Q E K E I K G I Q L G K E E V K L S L ·

4101 TCCTATCAA CATAGTGTG GAAGTCTGG CCAGGGCAAT CAGGCGAGG AAGGAAATAA AGGTATTCA ATTAGGAAA GAGGAAGTCA AATTGTCCCT  
Orf2  
· F A D D M I V Y L E N P I V S A Q N L L K L I S N F S K V S G Y K ·

4201 GTTGCAGAC GACATGATT TTTATCTAGA AAACCCATC GTCTCAGCCC AAAATCTCCT TAAGCTGATA AGCAACTTCA GCAAGTCTC AGGATACAAA  
Orf2  
· I N V Q K S Q A F L Y T N N R Q T E S Q I M X E L P X T I A S K R I ·

4301 ATCAATGTAC AAAAATCACA AGCATTCTTA TACACCAACA ACAGACAAC AGAGAGCCAA ATCATGAGTG AACTCCAT TACAATTGCT TCAAAGAGAA  
Orf2  
· K Y L G I Q L T R D V K D L F K E N Y K P L L K E I K E X T N K W ·

4401 TAAAATACCT AGGAATCCAA CTTACAAGGG ATGTGAAGGA CCTCTTCAAG GAGAACTACA AACCACTGCT CAAGGAAATA AAAGAGGAGA CAAACAATG  
Orf2  
· K N I P C S W V G R I N I V K M A I L P K V I Y R F N A I P I K L ·

4501 GAAGAATCATT CCATGCTCAT GGTAGGAAG AATCAATATC GTGAAAATGG CCATACTGCC CAAGTAATT TACAGATTCA ATGCCATCCC CATCAAGCTA  
Orf2  
· P M T F F T E L E K T T L K F I W N Q K R A R I A K S I L S Q K N K ·

4601 CCAATGACTT TCTTACAGA ATTGAAAAA ACTACTTTAA AGTTCATATG GAACCAAAA AGAGCCCGCA TTGCCAAGT AATCCTAAGC CAAAAGAACA  
Orf2  
· A G G I T L P D F K L Y Y K A T V T K T A W Y W Y Q N R D I D Q W ·

4701 AAGCTGGAGG CATCACACTA CCTGACTTCA AACTATACTA CAAGGTACA GTAACCAAAA CAGCATGGTA CTGGTACCAA AACAGAGATA TAGATCAATG  
Orf2  
· N X T E P S E I M P H I Y N Y L I F D K P E K N X Q W G K D S L F ·

4801 GAACATAACA GAGCCCTCAG AAATAATGCC GCATATCTAC AACTATCTGA TCTTTGACAA ACCTGAGAAA AACAGCAAT GGGGAAAGGA TTCCTGTGTT  
Orf2  
· N K W C W E N W L A I C R K L K L D P F L T P Y T K I N S R W I K D ·

4901 AATAAATGTT GCTGGGAAAA CTGGCTAGCC ATATGTAGAA AGCTGAACT GGATCCCTTC CTTACACCTT ATACAAAAAT CAATTCAAGA TGGATTAAAG  
Orf2

```

· L N V K P K T I K T L E E N L G I T I Q D I G V G K D F M S K T P
5001 ATTTAAACGT TAAACCTAAA ACCATAAAAA CCCTAGAAGA AAACCTAGGC ATTACCATTG AGGACATAGG CGTGGGCAAG GACTTCATGT CCAAAACACC
Orf2
· K A M A T K D K I D K W D L I K L K S F C T A K E T T I R V N R Q
5101 AAAAGCAATG GCAACAAAAG ACAAATTGA CAATGGGAT CTAATTAAAC TAAAGAGCTT CTGCACAGCA AAAGAAACTA CCATCAGAGT GAACAGGCAG
Orf2
P T T W E K I F A T Y S S D K G L I S R I Y N E L K Q I Y K K K T N
5201 CCTACAACAT GGGAGAAAAA TTTTGCAACC TACTCATCTG ACAAGGGGCT AATATCCAGA ATCTACAATG AACTYAAACA AATTTACAAG AAAAAACAA
Orf2
· N P I K K W A K D M N R H F S K E D I Y A A K K H M K K C S S S L
5301 ACAACCCCAT CAAAAGTGG GCGAAGGACA TGAACAGACA CTCTCAAAA GAAGACATTT ATGCAGCAA AAAACACATG AAGAAATGCT CATCATCACT
Orf2
· A I R E M Q I K T T M R Y H L T P V R M A I I K K S G N N R C W R
5401 GGCCATCAGA GAAATGCAA TCAAAACCAC TATGAGATAT CATCTCACAC CAGTTAGAAT GGCAATCATT AAAAAGTCAG GAAACAACAG GTGCTGGAGA
Orf2
G C G E I G T L L H C W W D C K L V Q P L W K S V W R F L R D L E L
5501 GGATGCGGAG AAATAGGAAC ACTTTTACAC TGTGTGGGG ACTGTAAACT AGTTCAACCA TTGTGGAGT CAGTGTGGCG ATTCCTCAGG GATCTAGAAC
Orf2
· E I P F D P A I P L L G I Y P N E Y K S C C Y K D T C T R M F I A
5601 TAGAAATACC ATTTGACCA GCCATCCCAT TACTGGGTAT ATACCCAAAT GAGTATAAAT CATGCTGCTA TAAAGACACA TGCACACGTA TGTTTATTGC
Orf2
· A L F T I A K T W N Q P K C P T M I D W I K K M W H I Y T M E Y Y
5701 GGCACATTC ACAATAGCAA AGACTTGGAA CCAACCCAAA TGTCACAAA TGATAGACTG GATTAAGAAA ATGTGGCACA TATACACCAT GAATACTAT
Orf2
A A I K N D E F I S F V G T W M K L E T I I L S K L S Q E Q K T K H
5801 GCAGCCATAA AAAATGATGA GTTCATATCC TTTGTAGGGA CATGGATGAA ATTGGAAACC ATCATICTCA GTAAACTATC GCAAGAACAA AAAACCAAAC
Orf2
· R I F S L I G G N
5901 ACCGCATATT CTCACITATA GGTGGGAATT GAACAATGAG ATCACATGGA CACAGGAAGG GGAATATCAC ACTCTGGGGA CTGTGGTGGG GTCGGGGGAG
6001 GGGGGAGGGA TAGCATTTGG AGATATACCT AATGCTAGAT GACACATTAG TGGGTGCAGC GCACCAGCAT GGCACATGTA TACATATGTA ACTAACCTGC
6101 ACAATGTGCA CATGTACCTT AAAACTTAGA GTATAATAAA AAAAAAAAAA AAAAAAAAAA AAAAAAAAAA AAAAAAAAAA AAAAAAAAAA AAAAAAAAAA
3'TSD
~~~~~
6201 AAAAACTATA CTGAATGCTA TCTTTCATAT TTCATGTTGG CAAAACATGA AAAATCTCAC ATAATTTTGC TTTTATGAAG CAAAGCTTTT ATGAAGCAAA
6301 CCTTTTATGA AGCAAAACTG AATAATGCAA GATACAAACG AAGGCTTATT TGTTTAAAAA TGAATAAAAA GAAATATATA TTCTAACAGA CTTTGTGTGAG
6401 TCTTTAGGTT TTTCTAAATA TAAGATTATG TCCCTCTGTA ACAAGAATAA TTGGACTTAT TCCAAAGTTG CAGG

```

L1-dn14

```

1 AGGTAATATGT TGGAAACATT TGTGAACAGA AGCAGGAAAC CTCATTAAGG TAAGGTATAA AAAGAACTTG AATAAATACA TAAACAACCT GAGCCTGTAA
TSD
101 TACAGGGCAA TAGAAAAACA CCAAAAAATG TCCAAATGTT CCATTTATGA TGAAATACA CAAGCACAGG GGGAGGAGCC AAGATGGCCG AATGAAGAAC
201 GCTCCGGTCT ACAGTCCCCA GCGTGAGCGA CGCAGAAGAC GGTGATTTCT GCATTTCCAT CTGAGGTACC GGGTTCATCT CACTAGGGAG TGCCAGACAG
301 TGGGCGCAGG CCGAGTGTGT TGCGCACCGT AAGCGAGCCG AAGCAGGGCC AGCCATTGCC TCACCTGGGA AGCGCAACGG GTCAGGGAGT TCCTTTCCCG
401 AGTCAAAGAA AGGGGTGACG GAGCCACCTG GAAAATCGGG TCACTCCACC CCGAATATTG CGCTTTTCAG ACCGGCTTAA GAAACGGGCG ACCACGAGAC
501 TATATCCCA ACCTGGCTCG GAGGGTCTTA CGCCACCGGA ATCTCGCTGA TTGCTAGCAC AGCAGTCTGA GATCAAACCT CAAGCGCGCA ACCAGGCTGG
601 GGGAGGGGGC CCGCCATTG CCGAGGCTTG CTTAGGTAAA CAAAGCAGCC GGAAGCTCG AACTGGGTGG AGCCCAACCC AGCTCAAGGA GCCTGCCTG
701 CCTCTGTAGG CTCACCTCT GGGGCGAGG CACAGACAAA CAAAAGATA CAGTAACCT CTGCAGACTT AAGTGTCCCT GTCTGACAGC TTTGAAGAGA
801 CGAGTGGTTC TCCAGCACG CAGCTGGAGA TCTGAGAACG GGCAGACTGC CTCCTCAAGT GGGTCCCTGA CTCTGACCC CCGAGCAGCC TAACTGGGAG
901 GCACCCCAAC GCAGGGGCAC ACTGACACCT CACATGGCAG GGTATTTCAA CAGACCTGCA GCTGAGGGTC CTGCTGTGTA
ORF1
M G K K Q N R K T
1001 AAAGGACATC TACACCGAAA ACCCATCTGT ACATCCCAT CATCAAAGC CAAAAGTAGA TAAAACCACA AAGATGGGGA AAAACAGAA CAGAAAAACT
ORF1
G N S K T Q S A S P P P K E R S S S P A T E Q S W M E N D F D E L R
1101 GAAAACCTTA AACCGCAGAG CGCCTCTCCT CCTCAAAGG AACGCAGTTC CTCACCAGCA ACAGAACAAA GCTGGATGGA GAATGATTTT GATGAGCTGA
ORF1
· E E G F R R S N Y S E L R E D I Q T K G K E V E N F E K N L E E C
1201 GAGAAGAAGG CTTAGACGCA TCAATTAAT CTGAGCTACG GGAGGACATT CAAACCAAAG GCAAAGAAGT TGAAAACCTT GAAAAAATTT TAGAAGAATG
ORF1
· I T R I T N T E K C L K E L M E L K T K A ■ E L R E E C R S L R S
1301 TATAACTAGA ATAACCAATA CAGAGAAGTG CTTAAAGGAG CTGATGGAGC TGAAAACCAA GGCTGGAGAA CTACGTGAAG AATGCAAGAG CCTCAGGAGC
ORF1
R C D Q L E E R V S A M E D E M N E M K R E G K F R E K R I K R N E
1401 CGATGCGATC AACTGGAAGA AAGGGTATCA GCAATGGAAG ATGAAATGAA TGAAATGAAG CGAGAAGGGA AGTTTGAAGA AAAAAGAATA AAAAAGAAATG
ORF1
· Q S L Q E I W D Y V K R P N L R L I G V P E S D V E N G T K L E N

```

1501 AGCAAAGCCT CCAAGAAATA TGGGACTATG TGAAAAGACC AAATCTACGT CTGATTGGTG TACCTGAAAAG TGATGTGGAG AATGGAACCA AGTTGAAA

ORF1

· T L Q D I I Q E N F P N L A R Q A N V Q I Q E I Q R T P Q R Y S S

1601 CACTCTGCAG GATATTATCC AGGAGAACTT CCCCAATCTA GCAAGGCAGG CCAACGTTCA GATTGAGGAA ATACAGAGAA CGCCACAAG ATACTCCTCG

ORF1

· R R A T P R H I I V R F T K V E M K E K M L R A A R E K G R V T L K

1701 AGAAGAGCAA CTCCAAGACA CATAATTGTC AGATTCACCA AAGTTGAAAT GAAGGAAAA ATGTTAAGGG CAGCCAGAGA GAAAGGTCGG GTTACCCTCA

ORF1

· G K P I R L T D L S A E T L Q A R R E W G P I F N I L K E K N F

1801 AAGGAAAGCC CATCAGACTA ACAGCGGATC TCTCGCAGA AACCTACAA GCCAGAAGAG AGTGGGGGCC AATATTCAAC ATTCTTAAAG AAAAGAATTT

ORF1

· Q P R I S Y P A K L S F I S E G E I K Y F I D K Q M L R D F V T T

1901 TCAACCCAGA ATTTATATC CAGCCAACT AAGCTTCATA AGTGAAGGAG AAATAAATA CTTTATAGAC AAGCAAATGT TGAGAGATTT TGTACCACC

ORF1

· R P A L K E L L K E A L N M E R N N R Y Q P L Q N H A K M

2001 AGGCCTGCC TAAAAGACT CCTGAAGGAA GCGCTAAACA TGGAAAAGAA CAACCGGTAC CAGCCGCTGC AAAATCATGC CAAAATGTAA AGACCATCGA

ORF2

· M T G S S H I T I L T L N I N

2101 GACTAGGAAG AAAGTGCATC AACTAATGAG CAAAATCACC AGTAAACATC ATAATGACAG GATCAACTTC ACACATAACA ATATTAACIT TAAATATAAA

ORF2

· G L N S A I K R H R L A S W I K S Q D P S V C C I Q E T H L T C R

2201 TGGACTAAAT TCTGCAATTA AAAGACACAG ACTGGCAAGT TGGATAAAGA GTCAAGACCC ATCAGTGTGC TGTATTCAGG AAACCCATCT CACGTGCAGA

ORF2

· D T H R L K I K G W R K I Y Q A N G K Q K K A G V A I L V S D K T D

2301 GACACACATA GGCTCAAAAT AAAAGGATGG AGGAAGATCT ACCAAGCCAA TGGAAAACAA AAAAAGGCAG GGGTTGCAAT CCTAGTCTCT GATAAAACAG

ORF2

· F K P T K I K R D K E G H Y I M V K G S I Q Q E E L T I L N I Y A

2401 ACTTTAAACC AACAAGATC AAAAGAGACA AAGAAGGCCA TTACATAATG GTAAAGGGAT CAATTCAACA AGAGGAGCTA ACAATCCTAA ATATTATGC

ORF2

· P N T G A P R F I K Q V L S D L Q R D L D S H T L I M G D F N T P

2501 ACCCAATACA GGAGCACCCA GATTCATAAA GCAAGTCTC AGTGACCTAC AAAGAGACTT AGACTCCCAC ACATTAATAA TGGGAGACTT TAACACCCCA

ORF2

· L S T L D R S T R Q K V N K D T Q E L N S A L H Q A D L I D I Y R T

2601 CTGTCAACAT TAGACAGATC AACGAGACAG AAGTTAACA AGGATACCCA GGAATTGAAC TCAGCTCTGC ACCAAGCAGA CCTAATAGAC ATCTACAGAA

ORF2

· L H P K S T E Y T F F S A P H H T Y S K I D H I V G S K A L L S K

2701 CTCTCCACC CAAATCAACA GAATATACAT TTTTTCAGC ACCACACCAC ACCTATCCA AAATGACCA CATAGTTGGA AGTAAAGCTC TCCTCAGCAA

ORF2

· C K R T E I I T N Y L S D H S A I K L E L R I K N L T Q S R S T T

2801 ATGTAAAAGA ACAGAAATTA TAACAACTA TCTCTCAGAC CACAGTGCAA TCAAACTAGA ACTCAGGATT AAGAATCTCA CTCAAAGCCG CTCAACTACA

ORF2

· W K L N N L L L N D Y W V H N E M K A E I K M F F E T N E N K D T T

2901 TGGAAACTGA ACAACCTGCT CCTGAATGAC TACTGGGTAC ATAACGAAAT GAAGGCAGAA ATAAAGATGT TCTTGAAAC CAACGAGAAC AAAGACACCA

ORF2

· Y Q N L W D A F K A V C R G K F I A L N A Y K R K Q E R S K I D T

3001 CATACCAGAA TCTCTGGGAC GCATTCAAAG CAGTGTGTAG AGGGAATTT ATAGCACTAA ATGCCTACAA GAGAAAGCAG GAAAGATCCA AAATTGACAC

ORF2

· L T S Q L K E L E K Q E Q T H S K A S R R Q E I T K I R A E L K E

3101 CCTAACATCA CAATTAAAG AACTAGAAAA GCAAGAGCAA ACACATTCAA AAGTAGCAG AAGGCAAGAA ATAACATAAA TCAGAGCAGA ACTGAAGGAA

ORF2

· I E T Q K T L Q K I N E S R S W F F E R I N K I D R P L A R L I K K

3201 ATAGAGACAC AAAAAACCCT TCAAAAAATC AATGAATCCA GGAGCTGGTT TTTTGAAGG ATCAACAAAA TTGATAGACC GCTAGCAAGA CTAATAAAGA

ORF2

```

· K R E K N Q I D T I K N D K G D I T T D P T E I Q T T I R E Y Y K ·
3301 AAAAAAGAGA GAAGAATCAA ATAGACACAA TAAAAAATGA TAAAGGGGAT ATCCACCACG ATCCACAGAG AATACAAACT ACCATCAGAG AATACTACAA
-----
ORF2
· H L Y A N K L E N L E E M D T F L D T Y T L P R L N Q E E V E S L ·
3401 ACACCTCTAC GCAATAAAC TAGAAATCT AGAAGAAATG GATACATCC TCGACACATA CACTCTCCA AGACTAAAC AGGAAGAAGT TGAATCTCTG
-----
ORF2
· N R P I T G S E I V A I I N S L P T K K S P G P D G F T A E F Y Q R ·
3501 AATCGACCAA TAACAGGCTC TGAATTGTG GCAATAATCA ATAGTTTACC AACCAAAAAG AGTCCAGGAC CAGATGGATT CACAGCCGAA TTCTACCAGA
-----
ORF2
· Y E E L V P F L L K L F Q S I E K E G I L P N S F Y E A S I I L ·
3601 GGTACAAGGA GGAAC TGTA CCATCTCTC TGAAACTATT CCAATCAATA GAAAAAGAGG GAATCTCTCC TAATCATTT TATGAGGCCA GCATCATCT
-----
ORF2
· I P K P G R D T T K K E N F R P I S L M N I D A K I L N K I L A N ·
3701 GATACCAAG CCGGGCAGAG ACACAACCAA AAAAGAGAAT TTAGACCAA TATCTTGAT GAACATTGAT GCAAAAATCC TCAATAAATC ACTGGCAAA
-----
ORF2
· R I Q Q H I K K L I H H D Q V G F I P G M Q G W F N I R K S I N V I ·
3801 CGAATCCAGC AGCAGATCAA AAAGCTTATC CACCATGATC AAGTGGGCTT CATCCCTGGG ATGCAAGGCT GGTCAATAT ACGCAAATCA ATAAATGTAA
-----
ORF2
· Q H I N R A K D K N H M I I S I D A E K A F D K I Q Q P F M L K T ·
3901 TCCAGCATAT AAACAGGCC AAAGACAAA ACCACATGAT TATCTCAATA GATGCAGAAA AAGCCITTGA CAAAATCAA CAACCCCTCA TGCTAAAAAC
-----
ORF2
· L N K L G I D G T Y F K I I R A I Y D K P T A N I I L N G Q K L E ·
4001 TCTCAATAAA TTAGTATTG ATGGGACGTA TTTCAAATA ATAAGAGCTA TCTATGACAA ACCCACAGCC AATATCATA TGAATGGGCA AAAACTGGAA
-----
ORF2
· A F P L K T G T R Q G C P L S P L L F N I V L E V L A R A I R Q E K ·
4101 GCATTCCCTT GAAAACCGC CACAAGACAG GGATGCCCTC TCTCACCCT CCTATTCAAC ATAGTGTGG AAGTCTGGC CAGGGCAATC AGGCAGGAGA
-----
ORF2
· E I K G I Q L G K E E V K L S L F A D D M I V Y L E N P I V S A Q ·
4201 AGGAAATAAA GGGTATCAA TTAGGAAAAG AGGAAGTCAA ATGTCCCTG TTGCAGAGC ACATGATTGT TTATCTAGAA AACCCCATGC TCTCAGCCCA
-----
ORF2
· N L L K L I S N F S K V S G Y K I N V Q K S Q A F L Y T N N R Q T ·
4301 AAATCTCCTT AAGCTGATA GCAACTCAG CAAAGTCTCA GGATACAAA TCAATGTACA AAAATCACA GCATCTTAT ACACCAACAA CAGACAAAACA
-----
ORF2
· E S Q I M G E L P F I A S K R I K Y L G I Q L T R D V K D L F K E ·
4401 GAGAGCCAAA TCATGGGTGA ACTCCCATC ACAATTGCTT CAAAGAGAA AAAATACCTA GGAATCCAAC TTACAAGGGA TGTGAAGGAC CTCTCAAGG
-----
ORF2
· N Y K P L L K E I K E T N K W K N I P C S W V G R I N I V K M A ·
4501 AGAACTACAA ACCACTGCTC AAGGAAATAA AAGAGGAGAC AAACAATGG AAGAACATTC CATGCTCATG GGTAGGAAGA ATCAATATCG TGAATGGC
-----
ORF2
· I L P K V I Y R F N A I P I K L P M T F F T E L E K T T L K F I W ·
4601 CATACTGCC AAGGTAATTT ACAGATTCAA TGCCATCCCC ATCAAGTAC CAATGACTTT CTTCACAGAA TTGGAAAAAA CTACTTTAAA GTTCATATGG
-----
ORF2
· N Q K R A R I A K S I L S Q K N K A G G I T L P D F K L Y Y K A T V ·
4701 AACCAAAAA GAGCCGCAT TGCCAAGTCA ATCTAAGCC AAAAGAACA AGCTGGAGGC ATCACACTAC CTGACTCAA ACTATACTAC AAGGCTACAG
-----
ORF2
· T K T A W Y W Y Q N R D I D Q W N R T E P S E I M P H I Y N Y L I ·
4801 TAACCAAAAC AGCATGGTAC TGGTACAAA ACAGAGATAT AGATCAATGG AACAGAACAG AGCCCTCAGA AATAATGCCG CATATCTACA ACTATCTGAT
-----
ORF2
· F D K P E K N K Q W G K D S L F N K W C W E N W L A I C R K L K L ·
4901 CTTGACAAA CCTGAGAAA ACAAGCAATG GGGAAAGGAT TCCTATTITA ATAAATGGTG CTGGGAAAAC TGGCTAGCCA TATGTAGAAA GCTGAAACTG
-----
ORF2
· D P F L T P Y T K I N S R W I K D L N V K P K T I K T L E E N L G I ·
5001 GATCCCTTC TTACACCTTA TACAAAATC AATCAAGAT GGATTAAGA TTTAAACGTT AAACCTAAAA CCATAAAAAC CCTAGAAGAA AACCTAGGCA
-----
ORF2
· T I Q D I G V G K D F M S K T P K A M A T K D K I D K W D L I K L ·

```

```

-----
5101 TTACCATTCA GGACATAGGC GTGGGCAAGG ACTTCATGTC CAAAACACCA AAAGCAATGG CAACAAAAGA CAAAATTGAC AAATGGGATC TAATTAACCT
ORF2
· K S F C T A K E T T I R V N R Q P T T W E K I F A T Y S S D K G L
-----
5201 AAAGAGCTTC TGCACAGCAA AAGAACTAC CATCAGAGTG AACAGGCAAC CTACAACATG GGAGAAAATT TTTGCAACCT ACTCATCTGA CAAAGGGCTA
ORF2
I S R I Y N E L K Q I Y K K K T N N P I K K W A K D M N R H F S K E
-----
5301 ATATCCAGAA TCTACAATGA ACTCAACAA ATTTACAAGA AAAAAACAA CAACCCATC AAAAAAGTGGG CGAAGGACAT GAACAGACAC TTCTCAAAG
ORF2
· D I Y A A K K H M K K C S S S L A I R E M Q I K T T M R Y H L T P
-----
5401 AAGACATTTA TGCAGCCAAA AAACACATGA AGAAATGCTC ATCATCACTG GCCATCAGAG AAATGCAAAT CAAAACCACT ATGAGATATC ATCTCACACC
ORF2
· V R M A I I K K S G N N R C W R G C G E I G T L L H C W W D C K L
-----
5501 AGTTAGAATG GCAATCATTAA AAAAGTCAGG AAACAACAGG TGCTGGAGAG GATGCGGAGA AATAGGAACA CTTTACACT GTTGGTGGGA CTGTAAACTA
ORF2
V Q P L W K S V W R F L R D L E L E I P F D P A I P L L G I Y P N E
-----
5601 GTTCAACCAT TGTGGAAGTC AGTGTGGCGA TTCCTCAGGG ATCTAGAACT AGAAATACCA TTTGACCCAG CCATCCCAT TACTGGTATA TACCCAATG
ORF2
· Y K S C C Y K D T C T R M F I A A L F T I A K T W N Q P K C P T M
-----
5701 AGTATAAATC ATGCTGCTAT AAAGACACAT GCACACGTAT GTTTATTGCG GCACATTTCA CAATAGCAAA GACTTGGAAC CAACCCAAAT GTCCAACAAT
ORF2
· I D W I K K M W H I Y T M E Y Y A A I K N D E F I S F V G T W M K
-----
5801 GATAGACTGG ATTAAGAAAA TGTGGCACAT ATACACCATG GAATACTATG CAGCCATAAA AAATGATGAG TTCATATCCT TTGTAGGGAC ATGGATGAAA
ORF2
L E T I I L S K L S Q E Q K T K H R I F S L I G G N
-----
5901 TTGGAAACCA TCATTCTCAG TAAACTATCG CAAGAACAAA AAACAAACA CCGCATATTC TCACTCATAG GTGGGAATTG AACAAAGAGA TCACATGGAC
6001 ACAGGAAGGG GAATATCACA CTCTGGGGAC TGTGGTGGGG TCGGGGAGG GGGGAGGGAT AGCATTGGGA GATATACCTA ATGTTAGATG ACACATTAGT
6101 GGGTGCAGCG CACCAGCATG GCACATGTAT ACATATGTAA CTAACCTGCA CAATGTGCAC ATGTACCCTA AAACCTAGAG TATAATAAAA AAAAAAAAAA
TSD
-----
6201 AAAAAAAAAA AAAAAAA GAA AATACACAAG CACAA ACCGAG AGATGTCITT AAACATTTTT CCCTAAATTT TAGATAAGCA GCCATCTAAC TGATATGTAC
6301 ATACAAAA

```

**Supplementary Figure 10: Nucleotide sequences of full-length L1 *de novo* insertions L1-dn4, L1-dn6 and L1-dn14 and their genomic flanks identified in hiPSCs.** In the case of L1-dn6, two independent long-range PCRs were performed on genomic iPSC DNA. Resulting PCR products, L1-dn6-5.4 and L1-dn6-2.2, were subcloned and sequenced. Each full-length L1 element codes for intact ORF1 and ORF2 proteins. TSDs are highlighted in green. Aminoacid residues that differ from the L1.3 reference sequence (accession number L19088.1)<sup>1</sup> are highlighted in red.



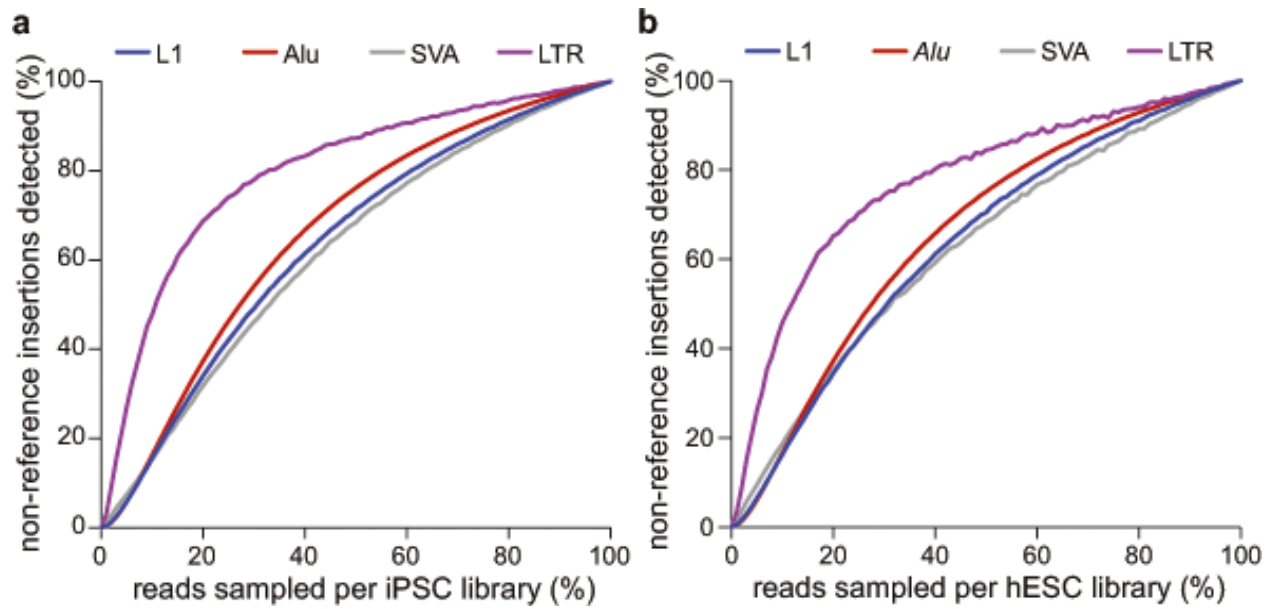

**Supplementary Figure 11: Modeling the sensitivity of RC-seq for the detection of *de novo* insertions in pluripotent stem cell cultures. Presented are proportions of non-reference genome L1, *Alu*, SVA and LTR insertions detected as a function of sampling depth for hiPSC (a) and hESC (b) RC-seq libraries.**

**a**

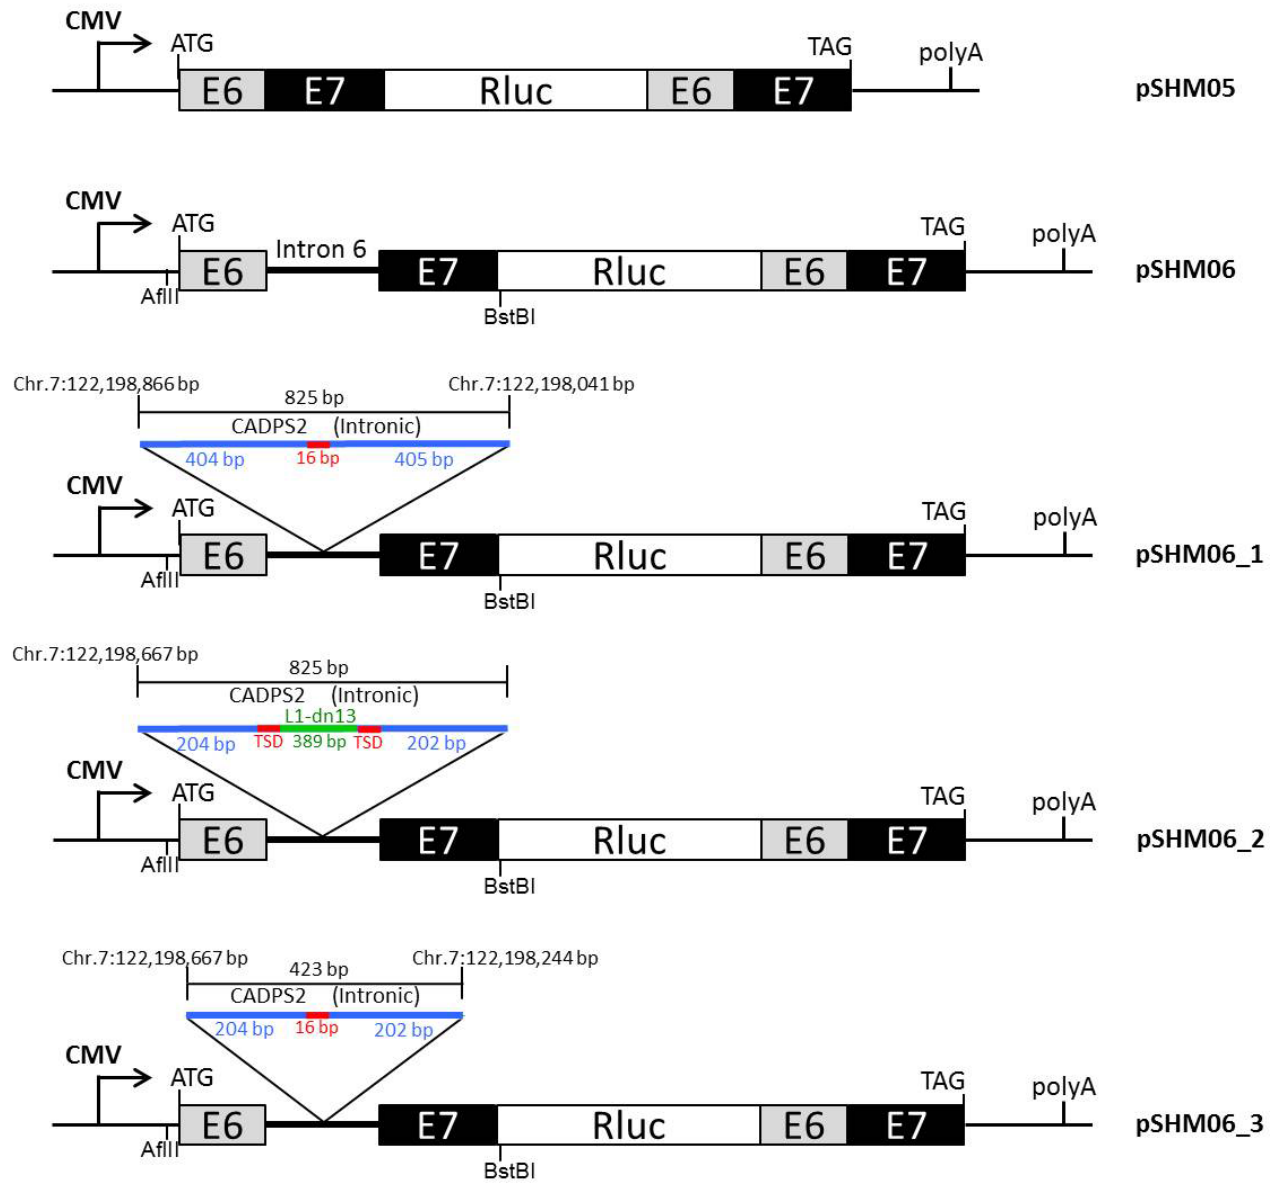

**b**

**pSHM06\_1: 1121-bp AflIII/BstBI fragment**

**AflIII**

cttaagcttcagcgctcggtccagcgccatggaagtacacgagaagctccgaggaaggctgaagt  
ccaacgtctctgatgaggctcagagcaccggtatcatttatgtaggtgagtggtttggttcccg  
gctgaggtggagtgaggctgaggactagactgagccctcggacatagtttggcctcaatcaggatctc  
agttagaaaagaacaatgtagaagtgacagcttatatatatttaagagaagctactctgaacccat  
atcactcctaaacatttctgtgtgtaaatgtgtattttatatttcatttttttaagcttagttttcc  
tctgtatattaaatttgatggaatttttaacaaatcctaaaaatccattttgtggtttccattacac  
cttagcaaatgacaagtgacactgacattttattatgaagaagatacattagctttatgtttaaga  
caagaaatcattttgtgccatgctgacaagacattaaagtgttggtgacaaaaataaatgagaaga  
agcagaatgcatacggaaaggttaagagaacgaatggtaaagaacaaaatagtttgctaaataata  
ttaaaagtattttgtacagagctatagtttaatttaaatgcgaatttaggatacagaaggaccttagt  
aagcttttatctgttaaatatttttaattattatgactgtcaacatcagacacaatctcctaaacatg  
aactgagtcctattgaagtggactgcttctaataaaaaaaaaacaattcttcattatttactttttaa  
agattttgaaacaaaataccttgttgatatactagtttaggatactgctaaatgctataacaagaagt  
cgttacatttcaataattcaaaaataatcaggtttgtaagagtttaccacaggtattcctgatagaa  
gtgtgacttcttccacatgggtgatttaggctctgatttcttctgcttctcagagggtggggaagg  
gcagactcatcccattcttgaccaagcccttgttctgctcccttcccaggctctgtgactggggcaac  
ctgcaaggagctggccagcaccggtacttcgaa

**BstBI**

**pSHM06\_2: 1123-bp AflIII/ BstBI fragment**

**AflIII**

Cttaagcttcagcgctcggtccagcgccatggaagtacacgagaagctccgaggaaggctgaagt  
ccaacgtctctgatgaggctcagagcaccggtatcatttatgtaggtgagtggtttggttcccg  
gctgaggtggagtgaggctgaggactagactgagccctcggacataaaaatccattttgtggtttccatt  
acaccttagcaaatgacaagtgacactgacattttattatgaagaagatacattagctttatggtt  
aagacaagaatcattttgtgccatgctgacaagacatttaagtgttggtgacaaaaataaatgag  
aagaagcagaatgcatacggaaaggttaagagaacgaatggtaaagaacaaaatagtttgatggttt  
ccaatttcatccatgtccctacaagatcattctcagtaaaactatcgcaagaacaaaaaccaaacac  
cgcatattctcactcataggtgggaattgaacaatgagatcacatggacacaggaaggggaatcac  
actctggggactgtggtgggctcggggagggggagggatagcatgggagataccttaacatgctag  
atgacacattagtggtgagcgcaccagcatggcactgtatacatatgtaactaacccgggcaatg  
tgacatgtaccctaaaacttaagtataataaaaaaaaaaaaaaaaaaaaaaaaaaaaaaaaaaaaa  
aaaaaaaaaaaaaaaaaaaaaaaaaaaaaaaaaaaaaaaaaaaaaaaaaaaaagaacaaaatagtttgctaaataat  
attaaaagtattttgtacagagctatagtttaatttaaatgcgaatttaggatacagaaggaccttag  
taagcttttatctgttaaatatttttaattattatgactgtcaacatcagacacaatctcctaaacat  
gaactgctctattgaagtggaactgcttctaataaaaaaaaaacaattcttcatggagggtggggatg  
gggcagactcatcccattcttgaccaagcccttgttctgctcccttcccaggctctgtgactggggca  
acctgcaaggagctggccagcaccggtacttcgaa

**BstBI**

**pSHM06\_3: 718-bp AflIII/BstBI fragment**

**AflIII**

cttaagcttcagcgctcggtccagcgccatggaagtacacgagaagctccgaggaaggctgaagt  
ccaacgtctctgatgaggctcagagcaccggtatcatttatgtaggtgagtggtttggttcccg  
gctgaggtggagtgaggctgaggactagactgagccctcggacataaaaatccattttgtggtttccatt  
acaccttagcaaatgacaagtgacactgacattttattatgaagaagatacattagctttatggtt  
aagacaagaatcattttgtgccatgctgacaagacatttaagtgttggtgacaaaaataaatgag  
aagaagcagaatgcatacggaaaggttaagagaacgaatggtaaagaacaaaatagtttgctaaat  
aatataaaaagtattttgtacagagctatagtttaatttaaatgcgaatttaggatacagaaggacct  
tagtaagcttttatctgttaaatatttttaattattatgactgtcaacatcagacacaatctcctaa  
catgaactgagtcctattgaagtggaactgcttctaataaaaaaaaaacaattcttcatggagggtggg  
atggggcagactcatcccattcttgaccaagcccttgttctgctcccttcccaggctctgtgactggg  
gcaacctgcaaggagctggccagcaccggtacttcgaa

**BstBI**

**C**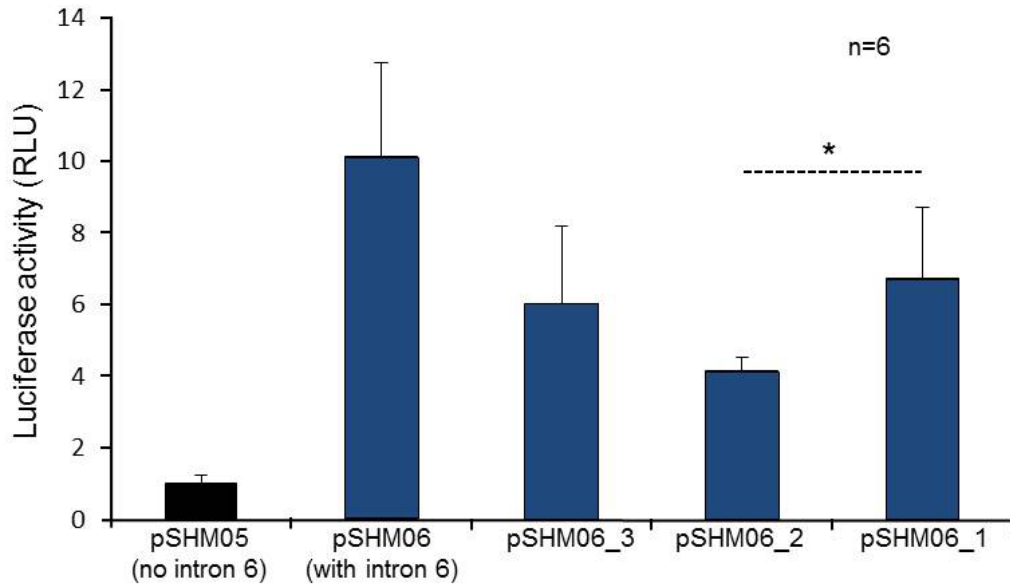

**Supplementary Figure 12: The 389-bp L1-dn13 insertion flanked by *CADPS2* intron 7 sequences has the strongest inhibitory effect on luciferase reporter gene expression.** (a) Schematic of TPI/Renilla luciferase reporter constructs used to evaluate the effect of the L1-dn13 insertion on reporter gene expression.

The 16-bp target sequence that was recognized by L1-EN and became the TSD of insertion L1-dn13, is marked in red. The 825-bp insertion in pSHM06\_2 covers the *CADPS2* intron 7 sequence encoded by the allele, in which insertion L1-dn13 occurred. The 825-bp insert in pSHM06\_2 differs from the same size insertion of pSHM06\_1 in the presence of insertion L1-dn13 (green) and the absence of the 202-bp and 203-bp sequences located at the 5' and 3' ends of the *CADPS2* intron sequence of pSHM06\_1, respectively. pSHM06\_2 differs from pSHM06\_3 exclusively in the absence of L1-dn13 including one TSD sequence. (b) Nucleotide sequences of the three synthesized AflII/BstBI DNA fragments inserted into the AflII/BstBI site of pSHM06<sup>2</sup>. Red underlined ATG, start codon of E6-E7-Rluc-E6-E7 expression cassette. Bold underlined lettering following ATG, E6 sequence. Bold underlined lettering at the 3' end, E7 sequence. Bold black lettering, TPI intron 6. Blue highlighted sequence, *CADPS2* intron 7 sequence. Green highlighted sequence, L1-dn13 insertion. Red repetitive sequence, 16-bp L1-EN target recognition sequence (pSHM06\_1, pSHM06\_3) or TSDs (pSHM06\_2), respectively. 825-bp and 422-bp *CADPS2* intron 7 sequences introduced into TPI intron 6 are highlighted in blue (pSHM06\_1, pSHM06\_3) or in blue and green (pSHM06\_2). (c) Relative cell lysate luciferase activity measured 48 h post-transfection. *CADPS2* intron sequence harbouring L1-dn13 reduced luciferase activity by ~62%. *CADPS2* intron sequences lacking L1-dn13 restrict luciferase activity by only 40-45%. The difference in luciferase activities obtained after transfection of pSHM06\_2 and pSHM06\_1 is significant ( $p=0.022$ ). Presented activities are an average of six independent experiments. Error bars represent arithmetic means  $\pm$  s.d. RLU, relative light units. Luciferase activities obtained after transfection of pSHM05 (no TPI intron 6) and pSHM06 (with TPI intron 6) served as controls.

**a**

Isolation of total RNA  
 ↓  
 cDNA synthesis  
 ↓  
 Quantitative endpoint PCR:

3'UTR of CADPS2 gene (Chr.7/pos. 121960004):

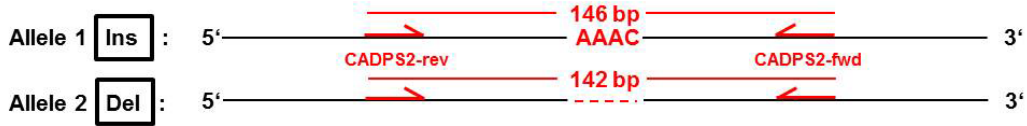

↓  
 Separation and quantification of PCR products  
 by capillary electrophoresis

**b**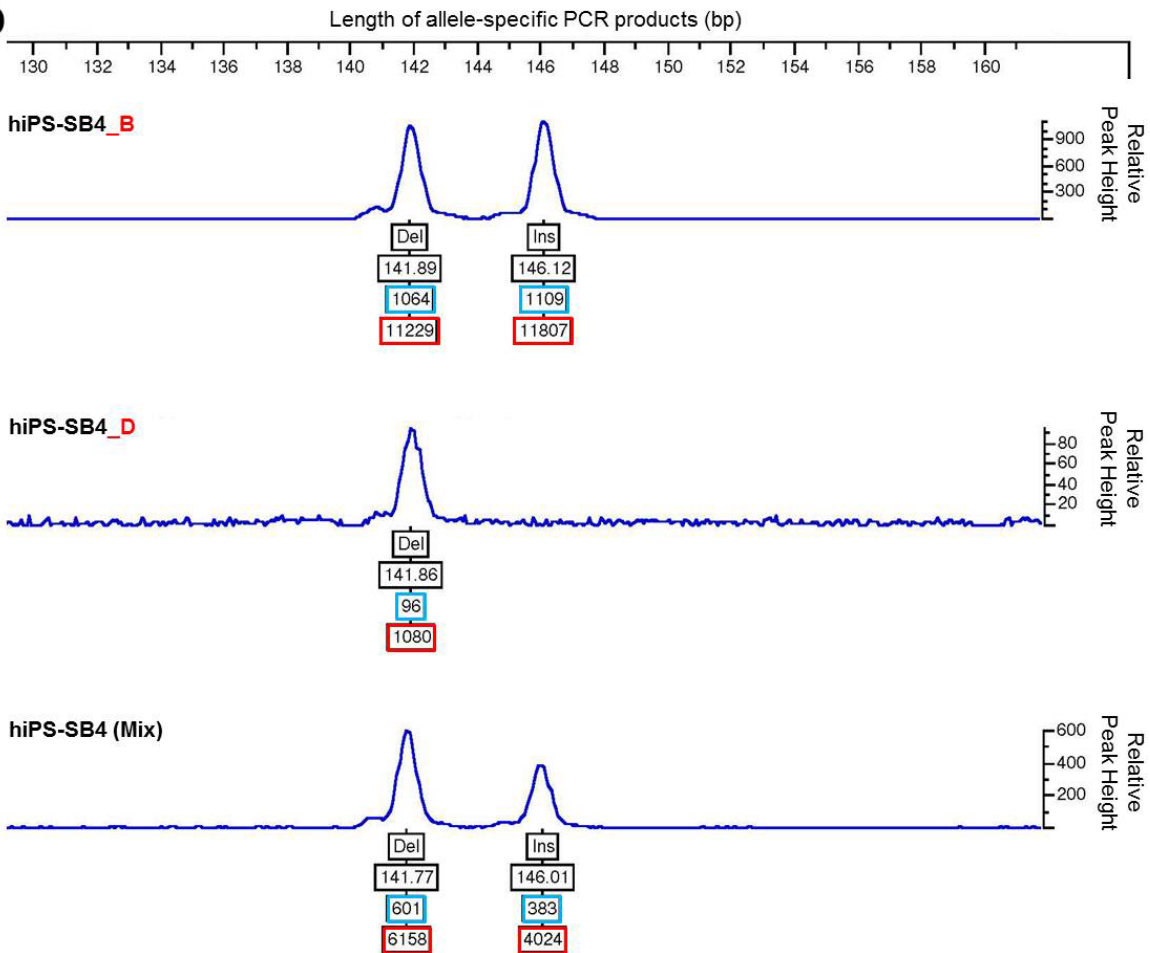

**Supplementary Figure 13: Quantification of allelic CADPS2 transcription in the hiPS-SB4(Mix) line and in single-cell subclones hiPS-SB4\_B and hiPS-SB4\_D.**

(a) Schematic of the procedure to quantify allelic CADPS2 transcription. Endpoint quantitative RT-PCR was performed using primers CADPS2-fwd and CADPS2-rev which bind 43-62 bp upstream and 64-85 bp downstream of the annotated common SNP CAAA(-/AAAC)AAACA (UTR-variant-3-prime), respectively. For quantification, a calibration curve was generated by PCR with CADPS2-fwd and CADPS2-rev on mixtures of both linearized plasmids each harbouring one synthesized *CADPS2*-3'UTR allele including the SNP. Allele-specific PCR products obtained from hiPS-SB4(Mix), hiPS-SB4\_B and hiPS-SB4\_D cells and from the calibration curve experiments were separated and quantified by capillary electrophoresis.

(b) Capillary electrophoresis to quantify allelic CADPS2 expression in hiPSC lines with and without the intronic L1-dn13 insertion. Peaks result from the 146-bp PCR product derived from allele 1 including the AAAC SNP (Ins) and from the 142-bp PCR product derived from allele 2 devoid of the AAAC sequence at position 121960004/Chr 7 (genome build GRCh37/hg19). Peak heights (blue boxes) and peak areas (red boxes) are a measure for the relative amounts of allele-specific transcriptional products. Numbers in black boxes, lengths of respective PCR products in bp. X-axis, length of allele-specific PCR products in bp; Y-axis, relative peak heights.

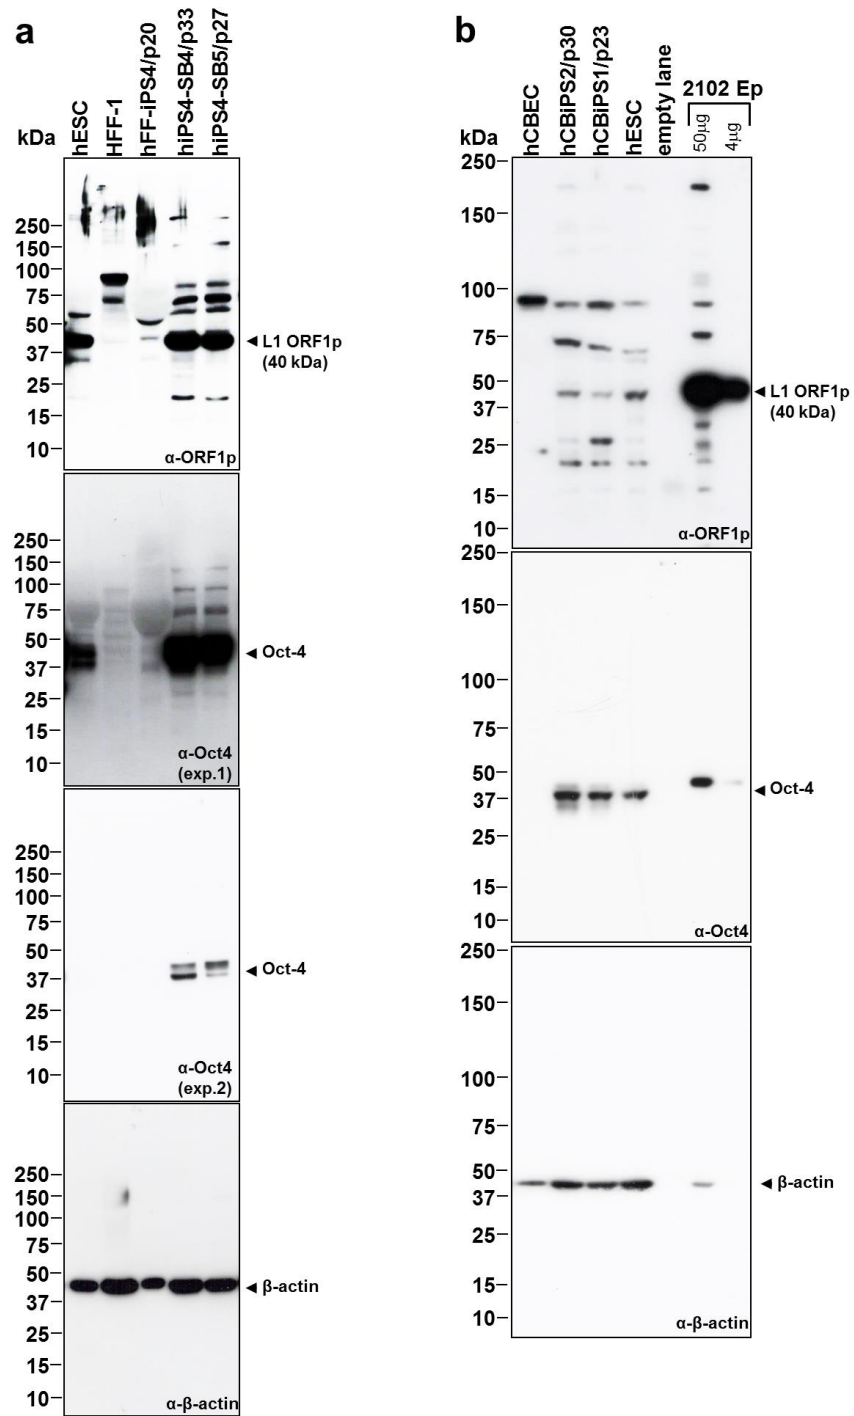

**Supplementary Figure 14: Immunoblot analysis of cell lysates from HFF-1 (a) and hCBEC (b) cells and their respective derived hiPSC lines.** Presented are full scans of the immunoblots presented in Figure 1e. Analyses demonstrate L1 ORF1p (40 kDa) and Oct-3/4 expression (A isoform, 45 kDa; B isoform 33 kDa) in pluripotent stem cells. Shorter (exp.1) and longer exposures (exp.2) of the  $\alpha$ Oct-3/4 immunoblot are provided. Lysates from hESC lines HES-3 (a) and H1 (b) and the embryonal carcinoma line 2102 Ep (b) served as positive control for L1 ORF1p and Oct-3/4 expression.  $\beta$ -actin (42 kDa) was used as loading control.

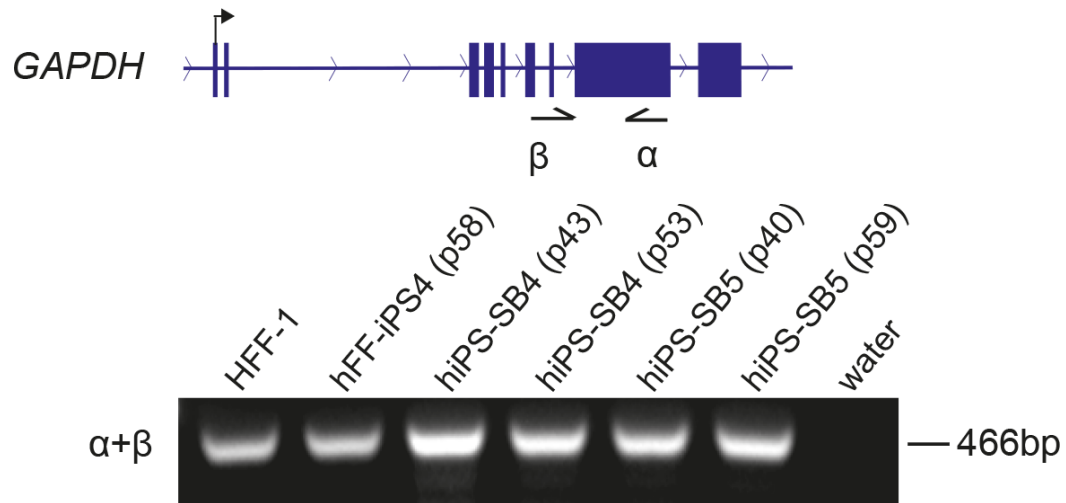

**Supplementary Figure 15: Control PCR validation.** As performed for the single-copy reference gene GAPDH in genomic DNA preparations of parental and iPSC lines used for RC-seq and PCR amplification of *de novo* insertions presented in Figure 3a. Primers GAPDH- $\alpha$  (Chr12: 6647005-6647026) and GAPDH- $\beta$  (Chr12:6646561-6646580) are located in exon 8 and intron 7, respectively. The resulting PCR product spans 466 bp.



**Supplementary Table 1: Applied primers and probes.**

| Primer/probe name | Target                    | Position in L1.3 or HERV-K reference | Annealing temperature (°C) | Product size (bp) | 5'-3' Sequences                 |
|-------------------|---------------------------|--------------------------------------|----------------------------|-------------------|---------------------------------|
| 5'-UTR 1f         | L1Hs                      | 1021-1087                            | 60                         | 67                | GAATGATTTTGACGAGCTGAGAGAA       |
| 5'-UTR 1r         |                           |                                      |                            |                   | GTCCTCCCGTAGCTCAGAGTAATT        |
| 5'-UTR 1p         |                           |                                      |                            |                   | AAGGCTTCAGACGATC                |
| 5'-UTR 2f         | L1Hs                      | 626-688                              | 60                         | 62                | ACAGCTTTGAAGAGAGCAGTGGTT        |
| 5'-UTR 2r         |                           |                                      |                            |                   | AGTCTGCCCGTTCTCAGATCT           |
| 5'-UTR 2p         |                           |                                      |                            |                   | TCCCAGCACGCAGC                  |
| L1_FW1 (n)        | L1Hs                      | 58-1356                              |                            | 1299              | AGCGACGCAGAAGACGGTGAT           |
| L1_RV1 (n)        |                           |                                      |                            |                   | CCCATATTTCTTGGAGGCTTTGC         |
| L1-13 f           | L1-dn13                   | -40-107                              | 60                         | 147               | AGCAGAAATGCATACAGAAAAGG         |
| L1-13 r           |                           |                                      |                            |                   | GGTTTCCAATTTTCATCCATGTC         |
| L1-13 p           |                           |                                      |                            |                   | ATATGTGCCACATTTTCTATGCAGCCA     |
| L1-14 f           | L1-dn14                   | -50-57                               | 60                         | 107               | ACAGGGCAATAGAAAAACACC           |
| L1-14 r           |                           |                                      |                            |                   | ACCGGAGCTGTTCTTATTC             |
| L1-14 p           |                           |                                      |                            |                   | TATGATGAAAATACACAAGCACAGGGGGAGG |
| HK-forward        | HERV-K HML-2              | 1626-1792                            | 60                         | 167               | GGCCATCAGAGTCTAAACCACG          |
| HK-reverse        |                           |                                      |                            |                   | CTGACTTTCTGGGGGTGGCCG           |
| actin_FW (n)      | Human $\beta$ -actin gene |                                      |                            | 491               | GCCGCCAGCTCACCATGGATG           |
| actin_RV (n)      |                           |                                      |                            |                   | GACCCCGTCACCGGAGTCCA            |
| OCT4 f            | OCT4                      |                                      | 60                         | 60                | CGACCATCTGCCGCTTTG              |
| OCT4 r            |                           |                                      |                            |                   | GCCGCAGCTTACACATGTTCT           |
| NANOG f           | NANOG                     |                                      | 60                         | 62                | CCA AAGGCA AACAACCCACTT         |
| NANOG r           |                           |                                      |                            |                   | CGGGACCTTGTCTTCCTTTTT           |
| SOX1 f            | SOX1                      |                                      | 60                         | 97                | CTGGCTGTGGCAAGGTCTTC            |
| SOX1 r            |                           |                                      |                            |                   | CAGCCCTCAAACCTCGCACTT           |
| TUBB3 f           | TUBB3                     |                                      | 60                         | 70                | GGCCAAGTTCTGGGAAGTCA            |
| TUBB3 r           |                           |                                      |                            |                   | CGAGTCGCCACGTAAGTTG             |
| AFP f             | AFP                       |                                      | 60                         | 182               | AGCTTGGTGGTGGATGAAAC            |
| AFP r             |                           |                                      |                            |                   | TCTGCAATGACAGCCTCAAG            |
| GATA6 f           | GATA6                     |                                      | 60                         | 178               | AGGGTGAACCCGTGTGCAATG           |
| GATA6 r           |                           |                                      |                            |                   | TGGAAGTTGGAGTCATGGGAATGG        |
| EOMES f           | EOMES                     |                                      | 60                         | 213               | AGAGGGCTGTGCCTTCCGTTTC          |
| EOMES r           |                           |                                      |                            |                   | AGCACACAGCAGAGGCCTAGCAAG        |
| GAPDH f           | GAPDH                     |                                      | 60                         | 60                | ATGGAA ATCCCATCACCATCTT         |
| GAPDH r           |                           |                                      |                            |                   | CGCCCCACTTGATTTTGG <sup>1</sup> |

<sup>1</sup> Presented are sequences of oligonucleotides (f, r) and probes (p) used for quantitative real-time RT-PCR and normal PCR amplification (n), including corresponding gene information, primer position and applied PCR condition.

**Supplementary Table 2: Applied antibodies**

| <b>Species</b> | <b>Class</b>                                 | <b>Name</b>                        | <b>Clonality</b> | <b>Vendor</b>                     | <b>Dilution</b>        |
|----------------|----------------------------------------------|------------------------------------|------------------|-----------------------------------|------------------------|
| Rabbit         | Rabbit IgG                                   | Anti-L1ORF1p                       | polyclonal       | Eurogentec <sup>z</sup>           | 1:2000 WB/<br>1:250 IF |
| Mouse          | Mouse IgG2b                                  | Anti-Oct3/4                        | monoclonal       | Santa Cruz                        | 1:1000 WB/<br>1:500 IF |
| Mouse          | Mouse IgG1                                   | Anti-CD105                         | monoclonal       | Dako                              | 1:500 IF               |
| Goat           | Goat IgG                                     | AlexaFluor488<br>Anti-Mouse        | polyclonal       | Invitrogen                        | 1:1000                 |
| Goat           | Goat IgG                                     | AlexaFluor647<br>Anti-Rabbit       | polyclonal       | Invitrogen                        | 1:1000                 |
| Sheep          | Sheep IgG                                    | ECL-HRP<br>coupled anti-<br>Mouse  | polyclonal       | GE Healthcare                     | 1:30.000               |
| Donkey         | Donkey IgG<br>F(ab) <sup>2</sup><br>fragment | ECL-HRP<br>coupled anti-<br>rabbit | polyclonal       | GE Healthcare                     | 1:30.000               |
| Mouse          | IgG2b                                        | Anti-Oct4                          | monoclonal       | Santa Cruz<br>Biotechnology       | 1:100                  |
| Mouse          | IgM                                          | Anti-SSEA-3                        | monoclonal       | Hybridoma Bank,<br>Iowa City, USA | 1:100                  |
| Mouse          | IgG3                                         | Anti-SSEA-4                        | monoclonal       | Hybridoma Bank,<br>Iowa City, USA | 1:70                   |
| Mouse          | IgM                                          | Anti-TRA-1-60                      | monoclonal       | Abcam                             | 1:100                  |
| Mouse          | IgG2a                                        | Anti- $\beta$ -Tubulin             | monoclonal       | Upstate,NY, USA                   | 1:400                  |
| Goat           | Goat IgG                                     | Anti-SOX17                         | monoclonal       | R&D Systems                       | 1:200                  |
| Mouse          | IgG1                                         | Anti-Troponin T                    | monoclonal       | Thermo Scientific                 | 1:100                  |

**Supplementary Table 3:** Validated, reprogramming-induced retrotransposition events in HFF-1-derived hiPSC lines and hESC line H9

| ID           | RC-seq information |                  |        |            |                                      | PCR validation                               |                                        |                               |
|--------------|--------------------|------------------|--------|------------|--------------------------------------|----------------------------------------------|----------------------------------------|-------------------------------|
|              | Chr                | Family           | Strand | Read count | Detected                             | Primer $\alpha$                              | Primer $\beta$                         | Detected                      |
| L1-dn3       | chr15              | L1-Ta            | -      | 10         | hiPS-SB4-p43,<br>hiPS-SB4-p53        | CCAGCCTAATTCC<br>TGTGACC                     | GTTGTTAACAGCA<br>TAATGATCCAAA          | hiPS-SB4-p43,<br>hiPS-SB4-p53 |
| L1-dn6       | chr10              | L1-Ta            | -      | 5          | hiPS-SB4-p53                         | GCAAAAATTTGGG<br>AAAAGATTG                   | AACTCCCTGACCC<br>CTTGC                 | hiPS-SB4-p43,<br>hiPS-SB4-p53 |
| <i>Alu-1</i> | chr15              | <i>AluYb8</i>    | -      | 9          | hFF-iPS4-p58                         | GGAGTGCCTTGAA<br>GGATGAG                     | CTGGCCTGCAATC<br>ACTAGT                | hFF-iPS4-p58                  |
| L1-dn10      | chr4               | L1-Ta            | -      | 4          | hiPS-SB4-p43                         | GATCCATGGCACA<br>AAAATGA                     | AACTCCCTGACCC<br>CTTGC                 | hiPS-SB4-p43,<br>hiPS-SB4-p53 |
| L1-dn14      | chr11              | L1-Ta            | -      | 2          | hiPS-SB4-p43                         | CAGGGCAATAGAA<br>AAACACCA                    | AACTCCCTGACCC<br>CTTGC                 | hiPS-SB4-p43,<br>hiPS-SB4-p53 |
| L1-dn15      | chr11              | L1-Ta            | -      | 2          | hiPS-SB5-p40                         | CTGTGGGGTACAT<br>GTGCTTG                     | CACCAGCATGGC<br>ACATGTAT               | hiPS-SB5-p40,<br>hiPS-SB5-p59 |
| L1-dn4       | chr5               | L1-pre-Ta        | -      | 3          | hiPS-SB5-p59                         | CATCCCAATCTGA<br>ACTACTGCAT                  | AGTGCACCAGCAT<br>AGCACAT               | hiPS-SB5-p40,<br>hiPS-SB5-p59 |
| L1-dn13      | chr7               | L1-Ta            | -      | 2          | hiPS-SB4-p53                         | GGATCCTTCTGTA<br>TCCTAAATTCG (= primer ISP1) | CACTCTGGGGACT<br>GTGGTG (= primer OP1) | hiPS-SB4-p53                  |
| <i>Alu-7</i> | chr4               | <i>AluYa5</i>    | +      | 14         | hiPS-CRL1502-p15<br>hiPS-CRL1502-p40 | TTGTTAGCCAGGA<br>TGGT                        | GATATAGCTTGGG<br>TGTTT                 | hiPS-CRL1502-p15              |
| SVA-2        | chr9               | SVA <sub>E</sub> | +      | 6          | hiPS-CRL1502-p15<br>hiPS-CRL1502-p40 | GGTCCTCTGCCTA<br>GGAAAACCA                   | CAGAGGGTCAGTT<br>CTACCCAG              | hiPS-CRL1502-p15              |
| <i>Alu-2</i> | chr10              | <i>AluYa5</i>    | +      | 3          | H9-p60                               | TGCTCCAGACAG<br>GTTTCTTCA                    | CAAGAACAGGCA<br>GGGGAGAG               | H9-p60                        |

## Supplementary Methods

### ***HERV-K-specific qRT-PCR using SYBR® Green I dye.***

To quantify transcripts levels of human endogenous retrovirus K group HERV-K(HML-2), *gag* specific primers listed in Table S1 were used as previously described<sup>3</sup>. qRT-PCR was performed with the Applied Biosystems 7900HT Fast Real-Time PCR System, FastStart SYBR Green Master Mix (Roche Applied Science, Mannheim, Germany) and the standard protocol. After 2 min incubation at 50°C, a 10-minute initial denaturation step at 95°C was followed by 40 amplification cycles of 15 s at 95°C and 60 s at 60°C. Dissociation curves were generated for the final PCR products by decreasing the temperature to 65°C for 15 s followed by an increase in temperature to 95°C. 18S rRNA transcripts (primers: 5'-GTCCCCCAACTTCTTAGAG-3' (for), 5'-CACCTACGGAAACCTTGTTAC-3'(rev)) were quantified as internal standard. The relative expression of HERV transcripts was calculated relative to HERV-K expression in human embryonic stem cell line HES-3, with values normalized to 18S rRNA. Quantitative RT-PCR experiments were performed for each gene in triplicate.

### ***Immunoblot analysis with subsequent multiplexed detection of proteins using two infrared (IR) fluorophores.***

20µg of each whole cell lysate were loaded on a 10% SDS-PAGE gel and transferred to nitrocellulose membranes following standard procedures. The blot was probed with rabbit anti-ORF1p (provided by Oliver Weichenrieder, Max-Planck Institute for Developmental Biology, Tübingen, Germany) at a dilution of 1:1000 and mouse anti-β-actin antibody (Sigma) at a dilution of 1:20,000. Next, we incubated membranes with fluorescent labeled antibodies (both at 1/10000) as follows: IRDye® 800CW Goat anti-Rabbit IgG (LI-COR P/N 926-32210) and IRDye 680LT Goat anti-Mouse IgG (LI-COR P/N 926-68020). IR fluorescence was measured and quantified using an Odyssey® device (LI-COR). We performed multiplexed detection of ORF1p and β-actin using green and redIR fluorophores simultaneously to quantify the rate of ORF1p/β-actin expression.

### ***Generation of TPI/Renilla Luciferase reporter constructs to evaluate the effect of the L1-dn13 insertion on reporter gene expression.***

The assay is predicated on a luciferase-based reporter system for monitoring the effects of individual introns on gene expression<sup>2</sup>. This reporter system is building on the plasmids pSHM05 and pSHM06 (Supplementary Fig. 12a,b)<sup>2</sup>. TPI exons 6 (E6; 85 nts) and 7 (E7; 38 nts) were cloned in frame at both ends of the Renilla luciferase ORF (no intron/pSHM05). In pSHM06, TPI intron 6 (127 nts) was inserted between exons 6 and 7 located at the 5' end of the expression cassette. An 825-bp sequence of *CADPS2* intron 7 in which insertion L1-dn13 occurred, was inserted into intron 6 of pSHM06 (pSHM06\_1). Sequence-verified gene fragments carrying an 825-bp portion (Chr.7: 122,198,866 –122,198,041) and a 422-bp portion (Chr.7: 122,198,667 - 122,198,244) of intron 7 of the human *CADPS2* gene were generated by Custom Gene Synthesis (Integrated DNA Technologies, Coralville, IA, USA) as part of the E6-intron6-E7 cassette that is flanked by AflII and BstBI restriction sites in pSHM06 (Supplementary Fig. 12a,b). A third fragment was synthesized carrying the corresponding *CADPS2* intron 7 sequence of the allele of the hiPS-SB4 cell line, harbouring the 389-bp L1-dn13 *de novo* insertion (Supplementary Fig. 12a,b). Nucleotide sequences of each of the three AflII/BstBI fragments are presented in Supplementary Fig. 12b. To generate TPI/Renilla Luciferase reporter constructs pSHM06\_1, pSHM06\_2 and pSHM06\_3 (Supplementary Fig. 12a), the 295-bp AflII/BstBI fragment in

pSHM06 was replaced by the 1121-bp, 1123-bp and the 718-bp AflIII/BstBI-fragment, respectively, presented in Supplementary Fig. 12b. Sequences of the AflIII/BstBI fragments in pSHM06\_1, pSHM06\_2 and pSHM06\_3 were validated by sequencing analysis.

### ***Luciferase reporter assays***

Luciferase reporter assays were performed in the human cervical carcinoma cell line HeLa-HA<sup>4</sup> using the Dual Luciferase Reporter System (Promega) according to the manufacturer's instructions.  $1 \times 10^5$  HeLa HA cells were seeded per well in 12-well plates (Nunc) for 24 h at 37°C. Subsequently, cells were transfected with 0.5 µg of the TPI/Renilla Luciferase reporter plasmid pSHM05, pSHM06, pSHM06\_1, pSHM06\_2 or pSHM06\_3 and 0.05 µg firefly luciferase reference plasmid pSF-CMV-Fluc (Sigma-Aldrich) using the FuGENE HD transfection reagent (Promega) according to the manufacturer's instructions. Each transfection was performed in sextuplicate. Light units were quantified using the microplate luminometer Infinite<sup>®</sup> 200 PRO (Tecan, Männedorf, Switzerland). The number of renilla luciferase light units was normalized according to manufacturer's instructions. P-values for the pairwise comparisons of pSHM06\_2 vs. pSHM06\_1, and pSHM06\_2 vs. vs. pSHM06\_3 (with 95% CI) were adjusted for multiple comparisons according to Bonferroni. Statistical analysis was performed with SAS<sup>®</sup>/STAT software (PROCGLM), version 9.3, SAS System for Windows.

### ***Quantification of allelic CADPS2 expression by endpoint quantitative PCR and capillary electrophoresis***

The presence of the annotated common SNP CAAA(-/AAAC)AAACA (UTR-variant-3-prime) in the genomes of the analyzed hiPSC lines hiPS-SB4(Mix), hiPS-SB4\_B and hiPS-SB4\_D was confirmed by sequence analysis of CADPS2-3'UTR-specific PCR products obtained using genomic DNA from the three lines as templates. 800ng total RNA per cell line were used as template to synthesize cDNA by applying the GoScript<sup>™</sup> Reverse Transcriptase system (Promega) according to the manufacturer's instructions. In order to facilitate quantification of allele-specific transcription by endpoint reverse transcription PCR<sup>5</sup>, the AAAC-SNP harbouring 3'UTR regions of both CADPS2 alleles covering 146 bp and 142 bp (GRCh37/hg19; Chr. 7 Pos. 121959943-121960091), respectively, were synthesized and cloned into the plasmid pEX-A2 (Eurofins Genomics, Ebersberg, Germany) resulting in plasmids pEX-CADPS2-Insertion and pEX-CADPS2-Deletion. To standardize the quantification, DNA copies of both alleles, pEX-CADPS2-Deletion and pEX-CADPS2-Insertion, were mixed at various ratios (99/0, 0/100, 90/10, 50/50, 25/75, 10/90, 5/95). Both standard plasmid mixtures and hiPSC line-specific cDNAs were then used as template for endpoint PCR using primers CADPS2-fwd (5'-CAAGCAGAGCCAAGGTTTCAT-3') and CADPS2-rev (5'-AGTAAGCCTGAATGTAGAGTA-3').

***Endpoint quantitative PCR:*** 25 µl of PCR mixture contained 3 µL of cDNA template (representing 15 % of the transcribed RNA) or 40,000 to 100,000 copies µL<sup>-1</sup> calibration plasmid DNA, 2.5 µl 10x Gold ST★R buffer (Promega, Madison), 1.5 U of AmpliTaq Gold DNA polymerase (ThermoFisher Scientific) and 0.2 µM each of CADPS2-fwd and CADPS2-rev primers. The 5' end of the forward primer was fluorescently labeled with 5-FAM. Thermal cycling conditions were as follows: initial denaturation of 12 min at 95°C; 35 cycles of 30 s at 95°C; 30 s at 59°C; 30 s at 72°C; and final extension of 10 min at 72°C. The PCRs were performed on a GeneAmp PCR system 9700 (Applied Biosystems). PCR products were diluted

at ratios 1:40, 1:100, and 1:500 and separated on POP-4<sup>TM</sup> separation matrix (ThermoFisher Scientific) by capillary electrophoresis using an Applied Biosystems 3500 Genetic Analyzer (LifeTechnologies). Electrophoresis and detection methods followed the manufacturer's technical manual. Samples were prepared for capillary electrophoresis using 1 µl RXN ILS 600 (Promega, Madison), 10 µl Hi-Di<sup>TM</sup> formamide (Life Technologies/Applied Biosystems), and 1 µl diluted sample. Injection conditions for the 3130xl Genetic Analyzer (Life Technologies/Applied Biosystems) instruments were 1.2 kV and 18s, running conditions were 15 kV and 1500 s. DNA profiles were analysed with GeneScan and Genotyper software (Life Technologies/Applied Biosystems).

*Calculation of Accuracy in Quantification of Allel-specific PCR products:* In capillary electrophoresis methods, the quantity of an amplified PCR product is represented by peak area (measured in relative fluorescent units, rfu) or peak height. Accuracy in quantification of allele-specific PCR products was calculated by comparison of ratio of peak area or height of the amplicons of the two alleles generated from defined mixtures (90/10, 75/25, 50/50) of the two control plasmids containing the two variants of the SNP with the ratio of peak area or height of the amplicons from the cDNA.

## Supplementary References

1. Sassaman, D. M., *et al.* Many human L1 elements are capable of retrotransposition. *Nat. Genet.*, **16**, 37–43 (1997).
2. Nott, A., Meislin, S. H., & Moore, M. J. A quantitative analysis of intron effects on mammalian gene expression. *RNA*. **9**, 607-17. (2003)
3. Diem, O., Schaffner, M., Seifarth, W., & Leib-Mösch, C. Influence of antipsychotic drugs on human endogenous retrovirus (HERV) transcription in brain cells. *PLoS. One*. **7**, e30054 (2012).
4. Hulme, A.E., Bogerd, H. P., Cullen B. R., & Moran J. V. Selective inhibition of Alu retrotransposition by APOBEC3G. *Gene*. **390**, 199-205 (2007)
5. Schmittgen, T.D., Zakrajsek, B.A., Mills, A.G., Gorn, V., Singer, M.J. and Reed, M.W. Quantitative reverse transcription-polymerase chain reaction to study mRNA decay: Comparison of endpoint and real-time methods. *Anal. Biochem*. **285**, 194-204 (2000)
